# Supplementary material for: New antiproliferative germacranolides from Carpesium divaricatum
Source: Royal Society of Chemistry journal article supplement (doi:10.1039/c9ra00478e), 2019-01-01
Supplement: c9ra00478e1.pdf [file c9ra00478e1.pdf]

## Supporting Information

### New antiproliferative germacranolides from *Carpesium divaricatum*

Tao Zhang,<sup>1#</sup> Qiu-Bo Zhang,<sup>1#</sup> Lu Fu,<sup>1,2</sup> Ling-Yu Li,<sup>1</sup> Li-Yan Ma,<sup>1</sup> Jin-Guang Si,<sup>1</sup>

Hong-Wu Zhang,<sup>1</sup> Jian-He Wei,<sup>1</sup> Shi-Shan Yu,<sup>3</sup> and Zhong-Mei Zou<sup>1\*</sup>

<sup>1</sup> Institute of Medicinal Plant Development, Chinese Academy of Medical Sciences and Peking Union Medical College, Beijing 100193, P. R. China.

<sup>2</sup> School of Pharmacy, Henan University of Traditional Chinese Medicine, Zhengzhou 450008, P. R. China.

<sup>3</sup> Institute of Materia Medica, Chinese Academy of Medical Sciences and Peking Union Medical College, Beijing 100150, P. R. China.

# These authors contributed equally to this study.

\* Corresponding Author

Zhong-Mei Zou, Tel/Fax: 86-10-57833290,

*E-mail address:* [zmzou@implad.ac.cn](mailto:zmzou@implad.ac.cn).

## Contents of Supplementary Information

|            | contents                                                                                          |
|------------|---------------------------------------------------------------------------------------------------|
| Fig.C1     | CD spectra of compounds <b>1–2</b>                                                                |
| Fig.C2     | CD spectra of compounds <b>3–6</b>                                                                |
| Fig. S1.1  | <sup>1</sup> H NMR spectrum (500 MHz) of compound <b>1</b> in CD <sub>3</sub> OD                  |
| Fig. S1.2  | <sup>13</sup> C NMR spectrum (125 MHz) of compound <b>1</b> in CD <sub>3</sub> OD                 |
| Fig. S1.3  | <sup>1</sup> H- <sup>1</sup> H COSY spectrum (500 MHz) of compound <b>1</b> in CD <sub>3</sub> OD |
| Fig. S1.4  | HSQC spectrum (500 MHz) of compound <b>1</b> in CD <sub>3</sub> OD                                |
| Fig. S1.5  | HMBC spectrum (500 MHz) of compound <b>1</b> in CD <sub>3</sub> OD                                |
| Fig. S1.6  | ROESY spectrum (500 MHz) of compound <b>1</b> in CD <sub>3</sub> OD                               |
| Fig. S1.7  | HRESIMS spectrum of compound <b>1</b>                                                             |
| Fig. S1.8  | CD spectrum of compound <b>1</b>                                                                  |
| Fig. S1.9  | X-ray ORTEP drawing of <b>1</b>                                                                   |
| Fig. S2.1  | <sup>1</sup> H NMR spectrum (600 MHz) of compound <b>2</b> in CD <sub>3</sub> OD                  |
| Fig. S2.2  | <sup>13</sup> C NMR spectrum (150 MHz) of compound <b>2</b> in CD <sub>3</sub> OD                 |
| Fig. S2.3  | <sup>1</sup> H- <sup>1</sup> H COSY spectrum (600 MHz) of compound <b>2</b> in CD <sub>3</sub> OD |
| Fig. S2.4  | HSQC spectrum (600 MHz) of compound <b>2</b> in CD <sub>3</sub> OD                                |
| Fig. S2.5  | HMBC spectrum (600 MHz) of compound <b>2</b> in CD <sub>3</sub> OD                                |
| Fig. S2.6  | NOESY spectrum (600 MHz) of compound <b>2</b> in CD <sub>3</sub> OD                               |
| Fig. S2.7  | UV spectrum of compound <b>2</b>                                                                  |
| Fig. S2.8  | IR spectrum of compound <b>2</b>                                                                  |
| Fig. S2.9  | HRESIMS spectrum of compound <b>2</b>                                                             |
| Fig. S2.10 | CD spectrum of compound <b>2</b>                                                                  |
| Fig. S3.1  | <sup>1</sup> H NMR spectrum (600 MHz) of compound <b>3</b> in CD <sub>3</sub> OD                  |
| Fig. S3.2  | <sup>13</sup> C NMR spectrum (150 MHz) of compound <b>3</b> in CD <sub>3</sub> OD                 |
| Fig. S3.3  | <sup>1</sup> H- <sup>1</sup> H COSY spectrum (600 MHz) of compound <b>3</b> in CD <sub>3</sub> OD |
| Fig. S3.4  | HSQC spectrum (600 MHz) of compound <b>3</b> in CD <sub>3</sub> OD                                |
| Fig. S3.5  | HMBC spectrum (600 MHz) of compound <b>3</b> in CD <sub>3</sub> OD                                |
| Fig. S3.6  | ROESY spectrum (600 MHz) of compound <b>3</b> in CD <sub>3</sub> OD                               |
| Fig. S3.7  | UV spectrum of compound <b>3</b>                                                                  |
| Fig. S3.8  | IR spectrum of compound <b>3</b>                                                                  |
| Fig. S3.9  | HRESIMS spectrum of compound <b>3</b>                                                             |
| Fig. S3.10 | CD spectrum of compound <b>3</b>                                                                  |
| Fig. S3.11 | X-ray ORTEP drawing of <b>3</b>                                                                   |
| Fig. S4.1  | <sup>1</sup> H NMR spectrum (500 MHz) of compound <b>4</b> in CD <sub>3</sub> OD                  |
| Fig. S4.2  | <sup>13</sup> C NMR spectrum (125 MHz) of compound <b>4</b> in CD <sub>3</sub> OD                 |
| Fig. S4.3  | <sup>1</sup> H- <sup>1</sup> H COSY spectrum (500 MHz) of compound <b>4</b> in CD <sub>3</sub> OD |
| Fig. S4.4  | HSQC spectrum (500 MHz) of compound <b>4</b> in CD <sub>3</sub> OD                                |
| Fig. S4.5  | HMBC spectrum (500 MHz) of compound <b>4</b> in CD <sub>3</sub> OD                                |
| Fig. S4.6  | NOESY spectrum (600 MHz) of compound <b>4</b> in CD <sub>3</sub> OD                               |
| Fig. S4.7  | UV spectrum of compound <b>4</b>                                                                  |
| Fig. S4.8  | IR spectrum of compound <b>4</b>                                                                  |

|            |                                                                                                   |
|------------|---------------------------------------------------------------------------------------------------|
| Fig. S4.9  | HRESIMS spectrum of compound <b>4</b>                                                             |
| Fig. S4.10 | CD spectrum of compound <b>4</b>                                                                  |
| Fig. S5.1  | <sup>1</sup> H NMR spectrum (500 MHz) of compound <b>5</b> in CD <sub>3</sub> OD                  |
| Fig. S5.2  | <sup>13</sup> C NMR spectrum (125 MHz) of compound <b>5</b> in CD <sub>3</sub> OD                 |
| Fig. S5.3  | <sup>1</sup> H- <sup>1</sup> H COSY spectrum (500 MHz) of compound <b>5</b> in CD <sub>3</sub> OD |
| Fig. S5.4  | HSQC spectrum (500 MHz) of compound <b>5</b> in CD <sub>3</sub> OD                                |
| Fig. S5.5  | HMBC spectrum (500 MHz) of compound <b>5</b> in CD <sub>3</sub> OD                                |
| Fig. S5.6  | ROESY spectrum (500 MHz) of compound <b>5</b> in CD <sub>3</sub> OD                               |
| Fig. S5.7  | UV spectrum of compound <b>5</b>                                                                  |
| Fig. S5.8  | IR spectrum of compound <b>5</b>                                                                  |
| Fig. S5.9  | HRESIMS spectrum of compound <b>5</b>                                                             |
| Fig. S5.10 | CD spectrum of compound <b>5</b>                                                                  |
| Fig. S6.1  | <sup>1</sup> H NMR spectrum (500 MHz) of compound <b>6</b> in CD <sub>3</sub> OD                  |
| Fig. S6.2  | <sup>13</sup> C NMR spectrum (125 MHz) of compound <b>6</b> in CD <sub>3</sub> OD                 |
| Fig. S6.3  | <sup>1</sup> H- <sup>1</sup> H COSY spectrum (500 MHz) of compound <b>6</b> in CD <sub>3</sub> OD |
| Fig. S6.4  | HSQC spectrum (500 MHz) of compound <b>6</b> in CD <sub>3</sub> OD                                |
| Fig. S6.5  | HMBC spectrum (500 MHz) of compound <b>6</b> in CD <sub>3</sub> OD                                |
| Fig. S6.6  | ROESY spectrum (500 MHz) of compound <b>6</b> in CD <sub>3</sub> OD                               |
| Fig. S6.7  | UV spectrum of compound <b>6</b>                                                                  |
| Fig. S6.8  | IR spectrum of compound <b>6</b>                                                                  |
| Fig. S6.9  | HRESIMS spectrum of compound <b>6</b>                                                             |
| Fig. S6.10 | CD spectrum of compound <b>6</b>                                                                  |
| Fig. S7.1  | <sup>1</sup> H NMR spectrum (500 MHz) of compound <b>7</b> in CD <sub>3</sub> OD                  |
| Fig. S7.2  | <sup>13</sup> C NMR spectrum (125 MHz) of compound <b>7</b> in CD <sub>3</sub> OD                 |
| Fig. S7.3  | <sup>1</sup> H- <sup>1</sup> H COSY spectrum (500 MHz) of compound <b>7</b> in CD <sub>3</sub> OD |
| Fig. S7.4  | HSQC spectrum (500 MHz) of compound <b>7</b> in CD <sub>3</sub> OD                                |
| Fig. S7.5  | HMBC spectrum (500 MHz) of compound <b>7</b> in CD <sub>3</sub> OD                                |
| Fig. S7.6  | ROESY spectrum (600 MHz) of compound <b>7</b> in CD <sub>3</sub> OD                               |
| Fig. S7.7  | UV spectrum of compound <b>7</b>                                                                  |
| Fig. S7.8  | IR spectrum of compound <b>7</b>                                                                  |
| Fig. S7.9  | HRESIMS spectrum of compound <b>7</b>                                                             |
| Fig. S7.10 | CD spectrum of compound <b>7</b>                                                                  |

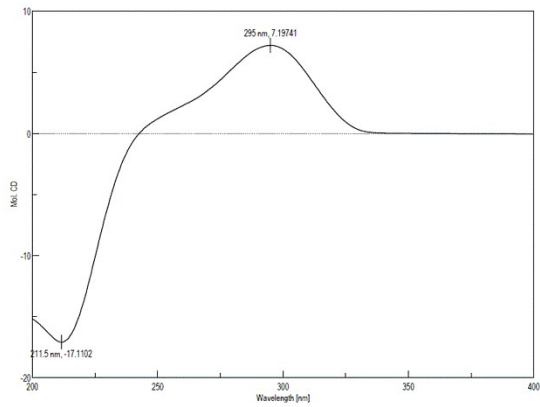

**1**

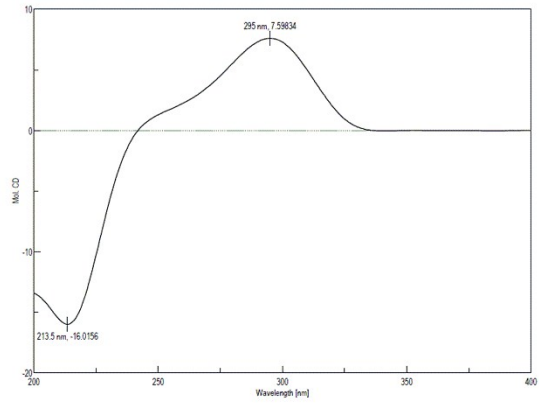

**2**

Fig.C1 CD spectra of compounds 1–2

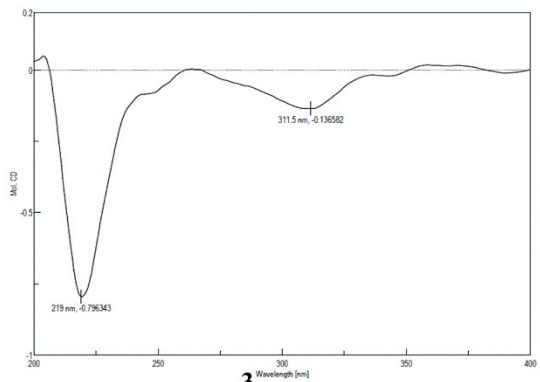

**3**

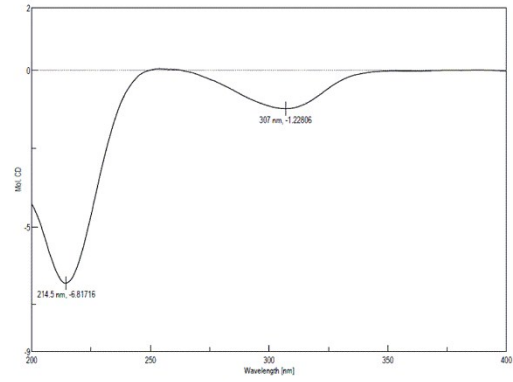

**4**

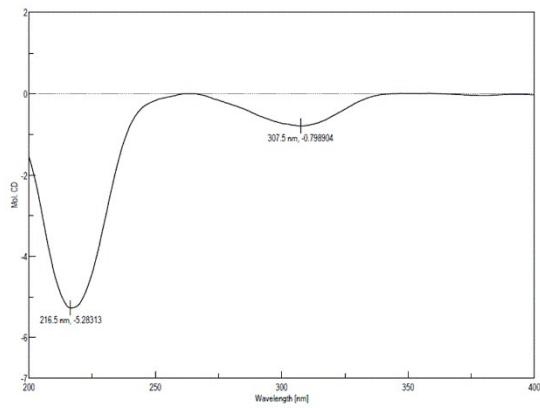

**5**

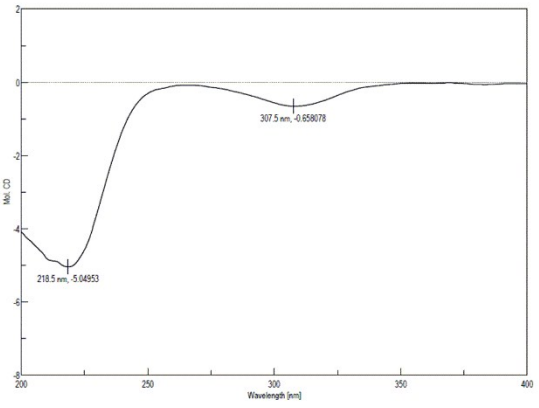

**6**

Fig.C2 CD spectra of compounds 3–6

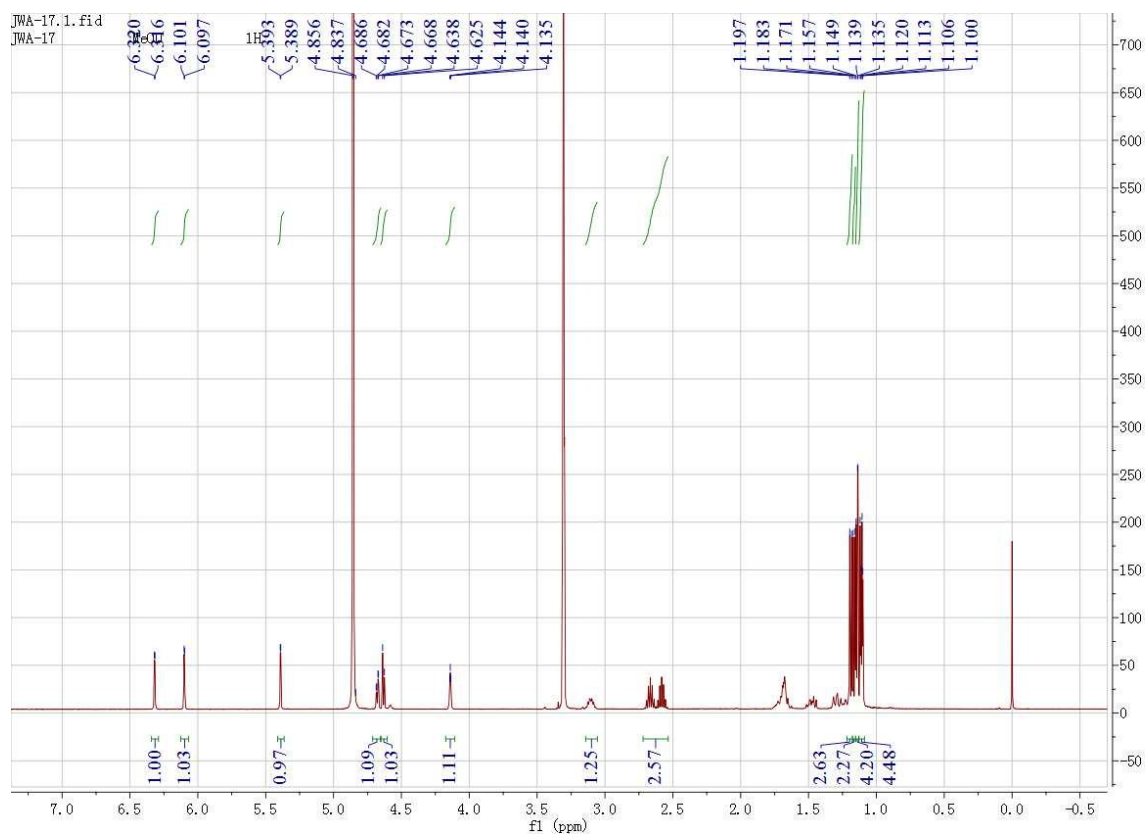

Fig. S1.1  $^1\text{H}$  NMR spectrum (500 MHz) of compound **1** in  $\text{CD}_3\text{OD}$

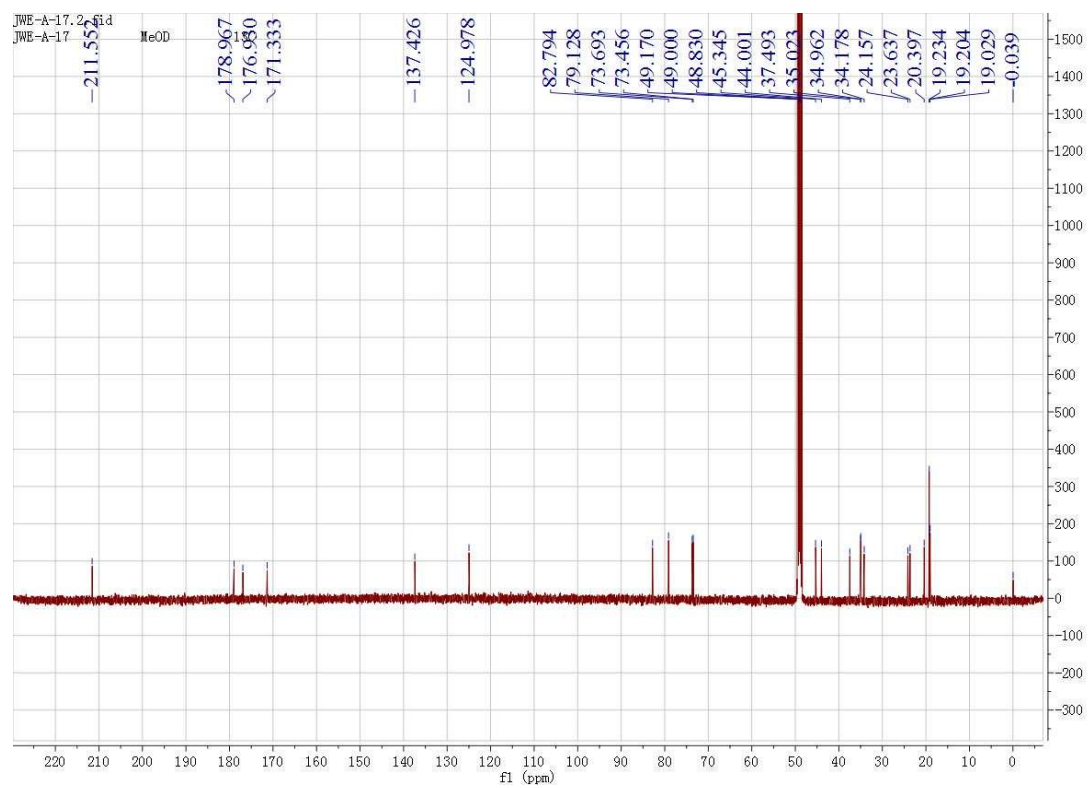

Fig. S1.2  $^{13}\text{C}$  NMR spectrum (125 MHz) of compound **1** in  $\text{CD}_3\text{OD}$

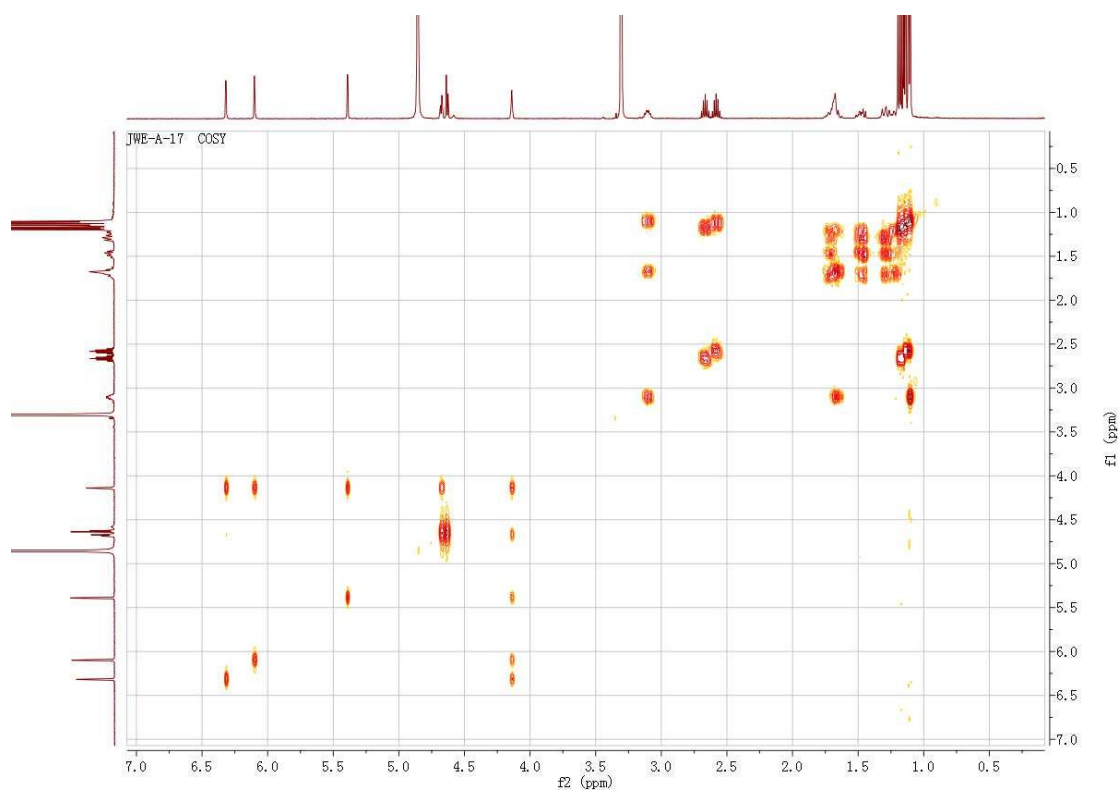

Fig. S1.3  $^1\text{H}$ - $^1\text{H}$  COSY spectrum (500 MHz) of compound **1** in  $\text{CD}_3\text{OD}$

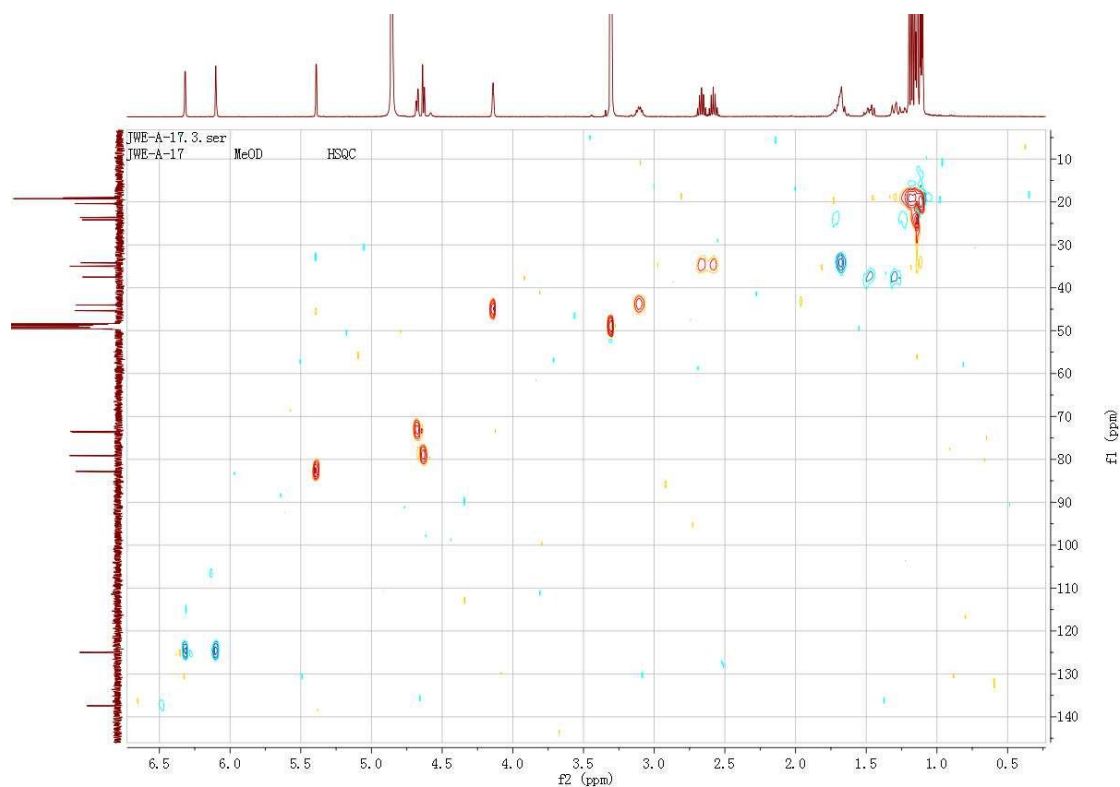

Fig. S1.4 HSQC spectrum (500 MHz) of compound **1** in  $\text{CD}_3\text{OD}$

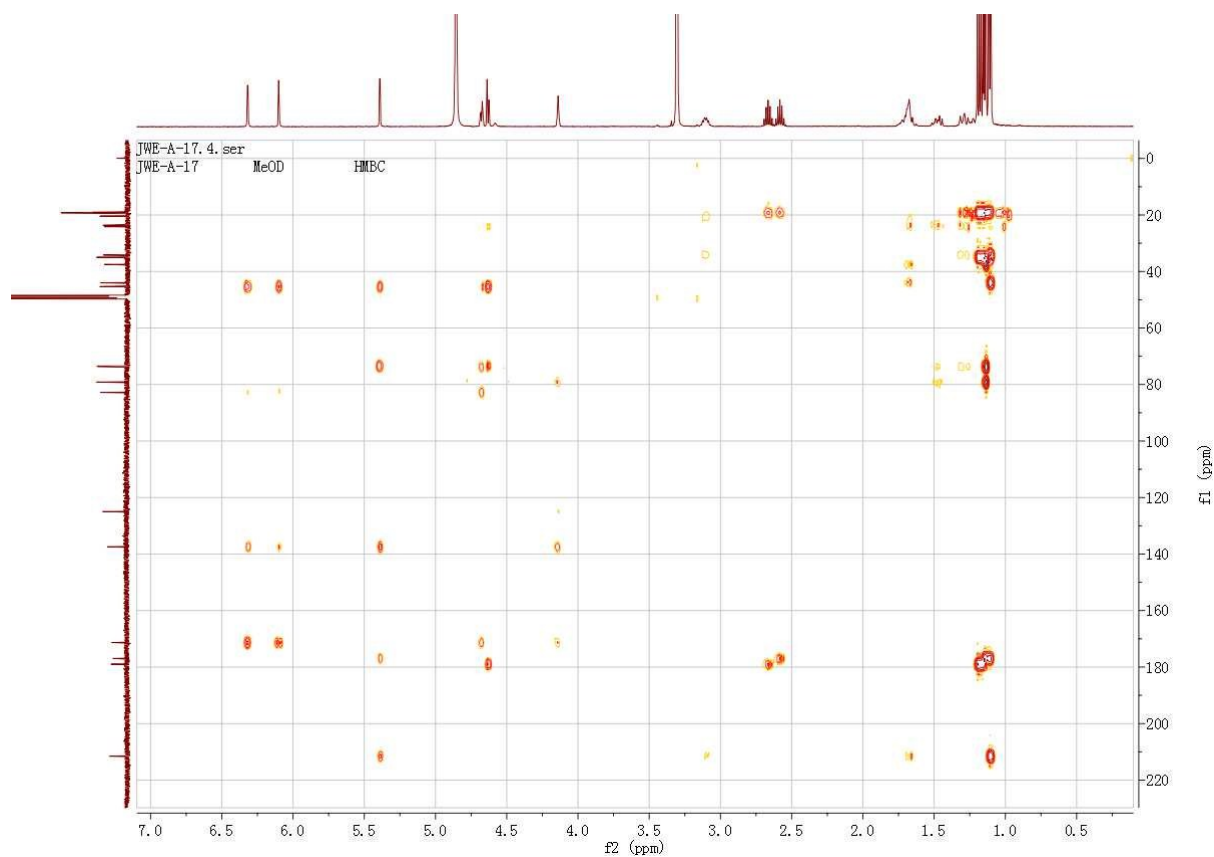

Fig. S1.5 HMBC spectrum (500 MHz) of compound **1** in CD<sub>3</sub>OD

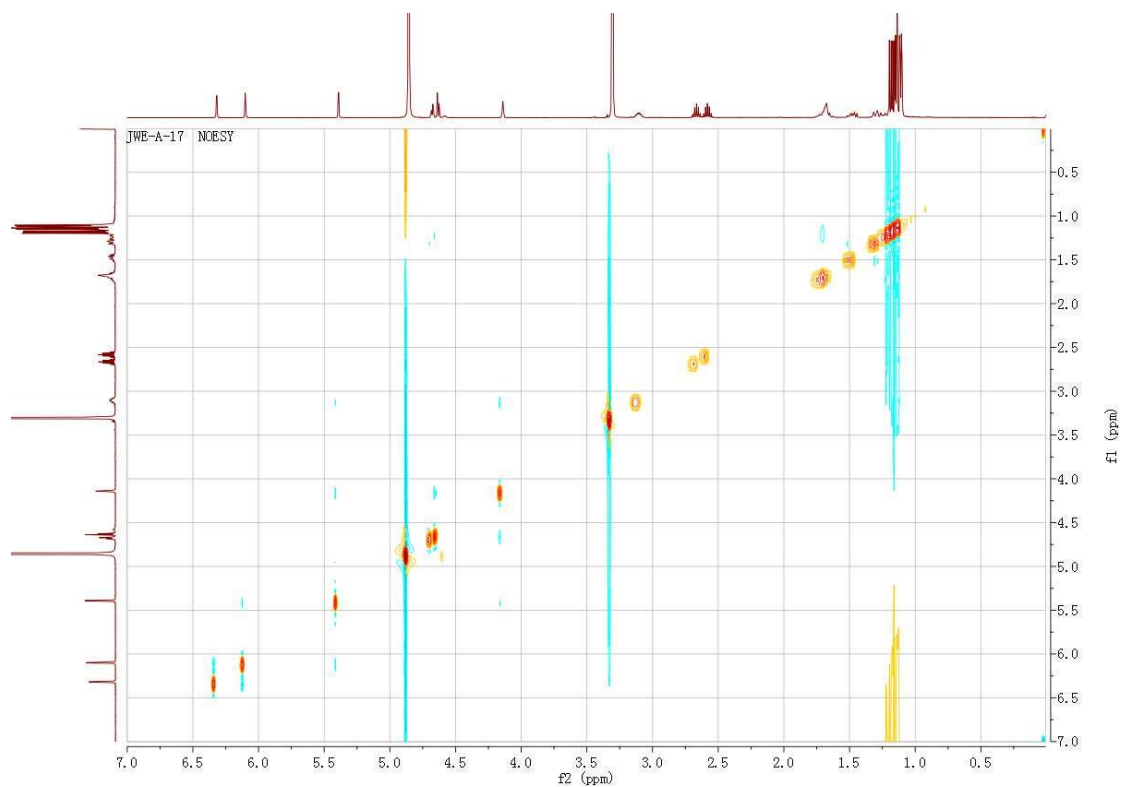

Fig. S1.6 ROESY spectrum (500 MHz) of compound **1** in CD<sub>3</sub>OD

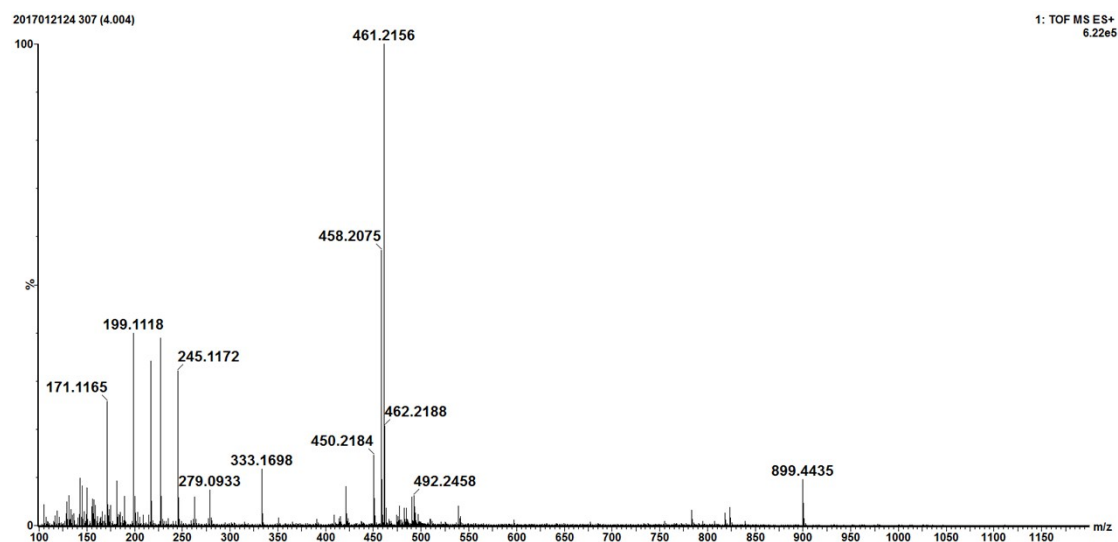

Fig. S1.7 HRESIMS spectrum of compound **1**

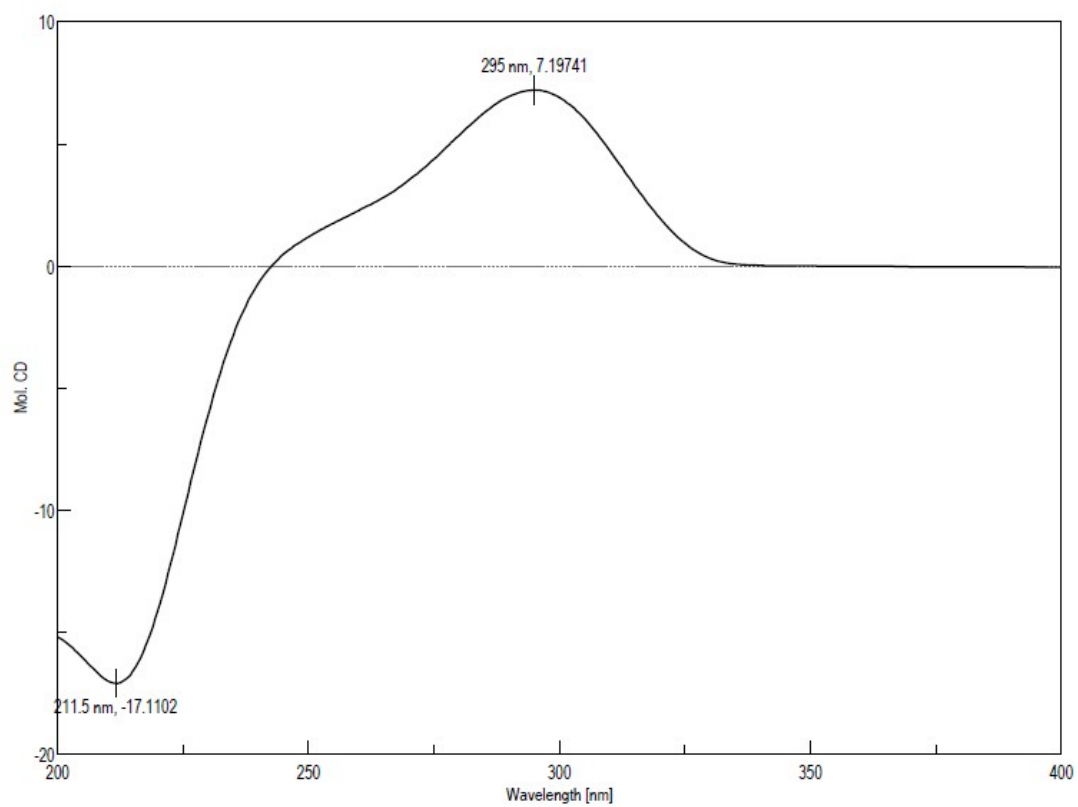

Fig. S1.8 CD spectrum of compound **1**



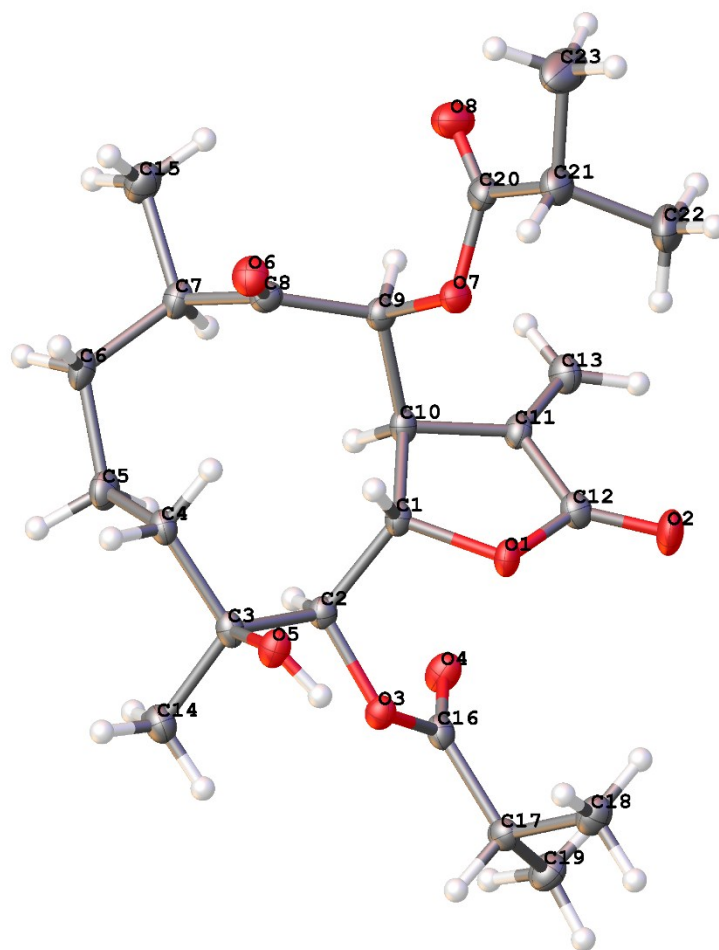

Fig. S1.9 X-ray ORTEP drawing of 1

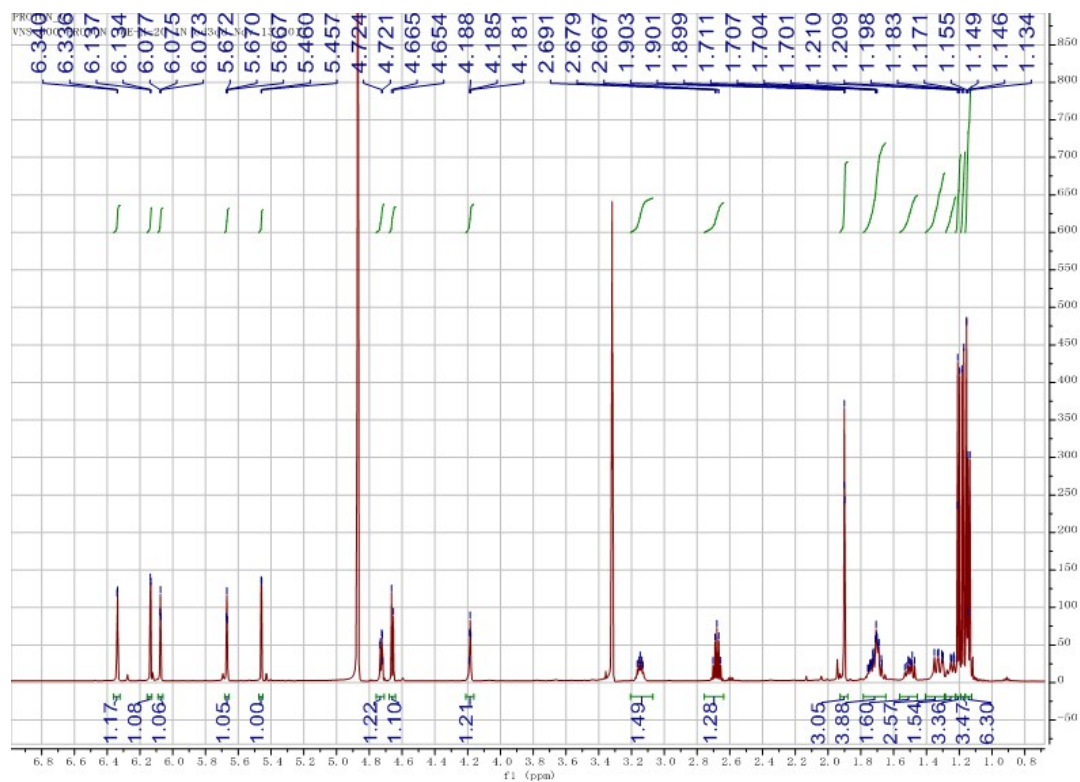

Fig. S2.1 <sup>1</sup>H NMR spectrum (600 MHz) of compound **2** in CD<sub>3</sub>OD

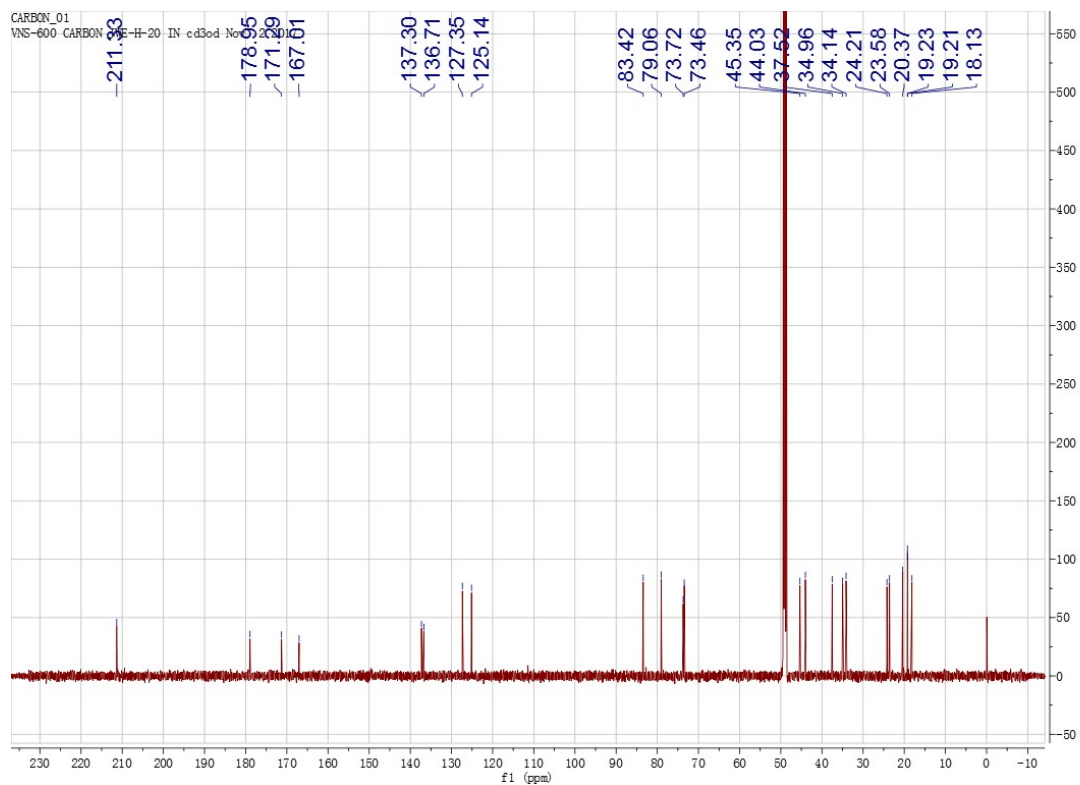

Fig. S2.2 <sup>13</sup>C NMR spectrum (150 MHz) of compound **2** in CD<sub>3</sub>OD

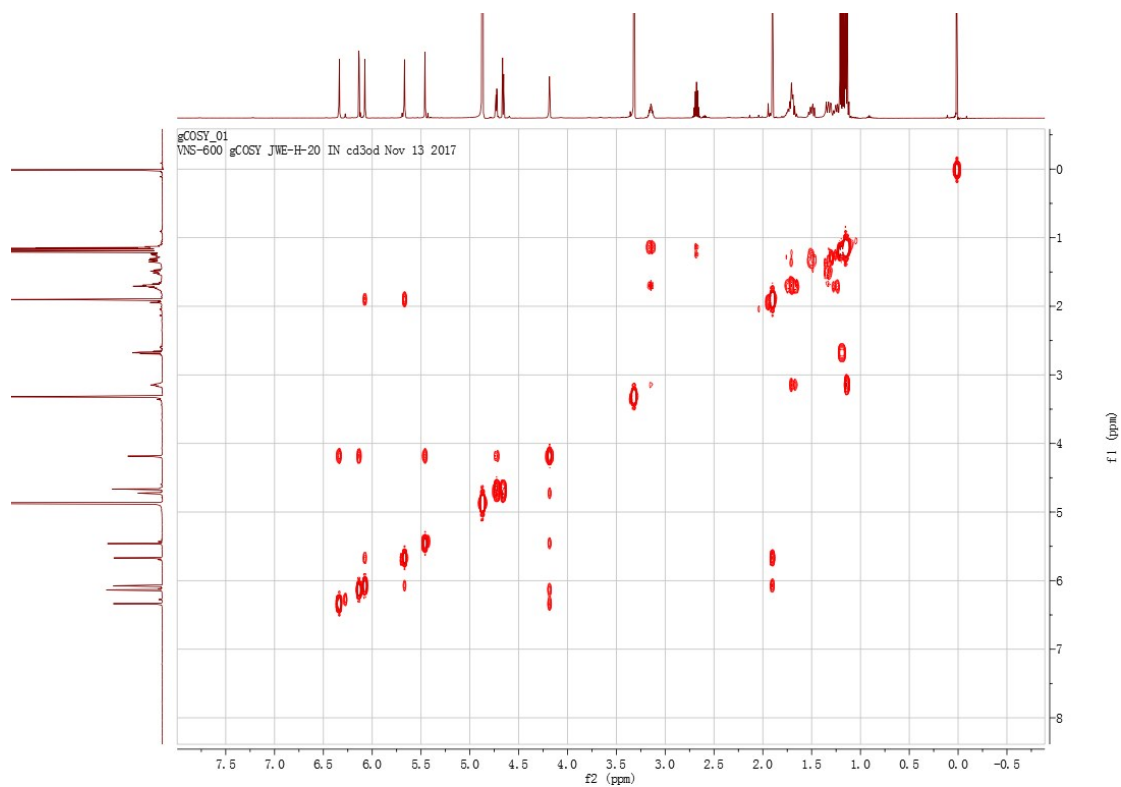

Fig. S2.3  $^1\text{H}$ - $^1\text{H}$  COSY spectrum (600 MHz) of compound **2** in  $\text{CD}_3\text{OD}$

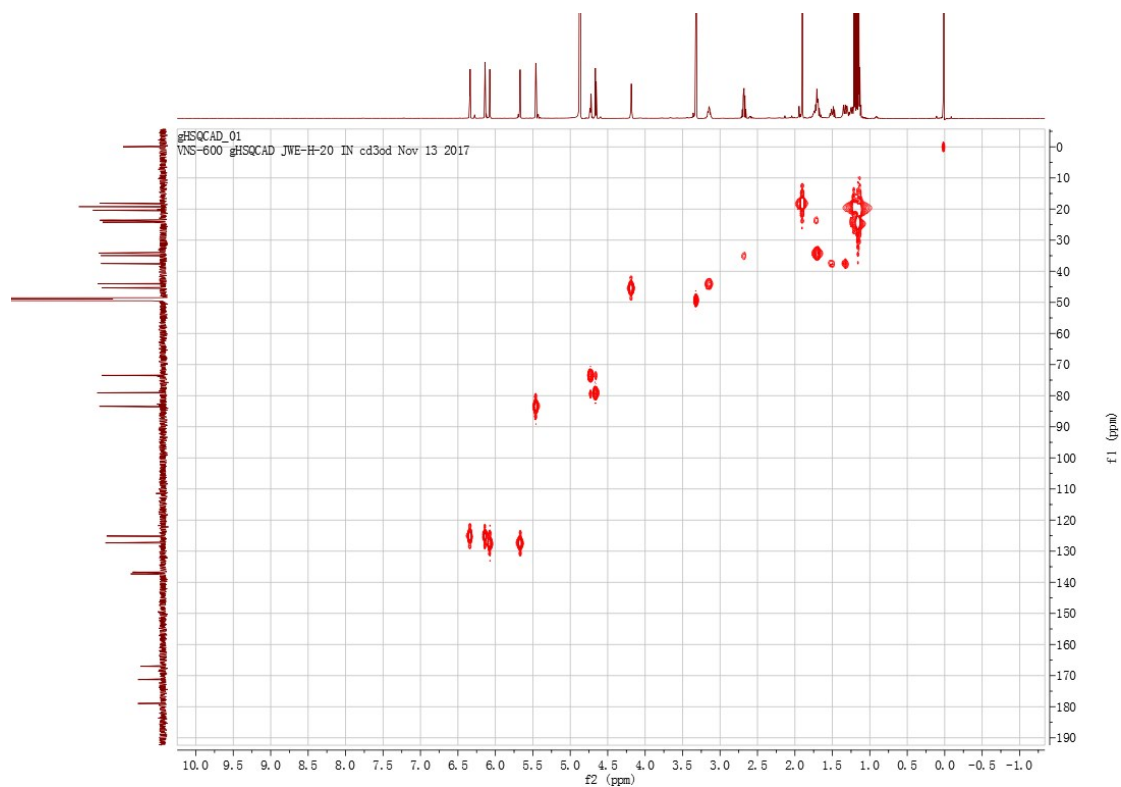

Fig. S2.4 HSQC spectrum (600 MHz) of compound **2** in  $\text{CD}_3\text{OD}$

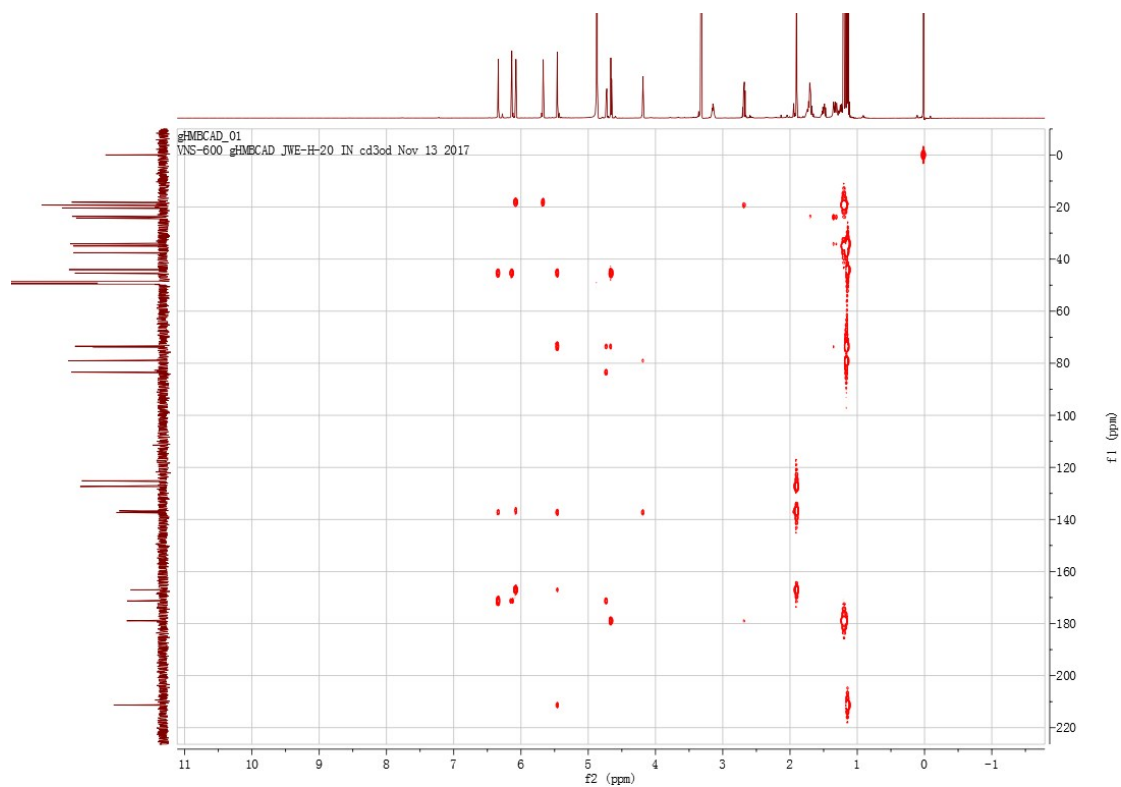

Fig. S2.5 HMBC spectrum (600 MHz) of compound **2** in CD<sub>3</sub>OD

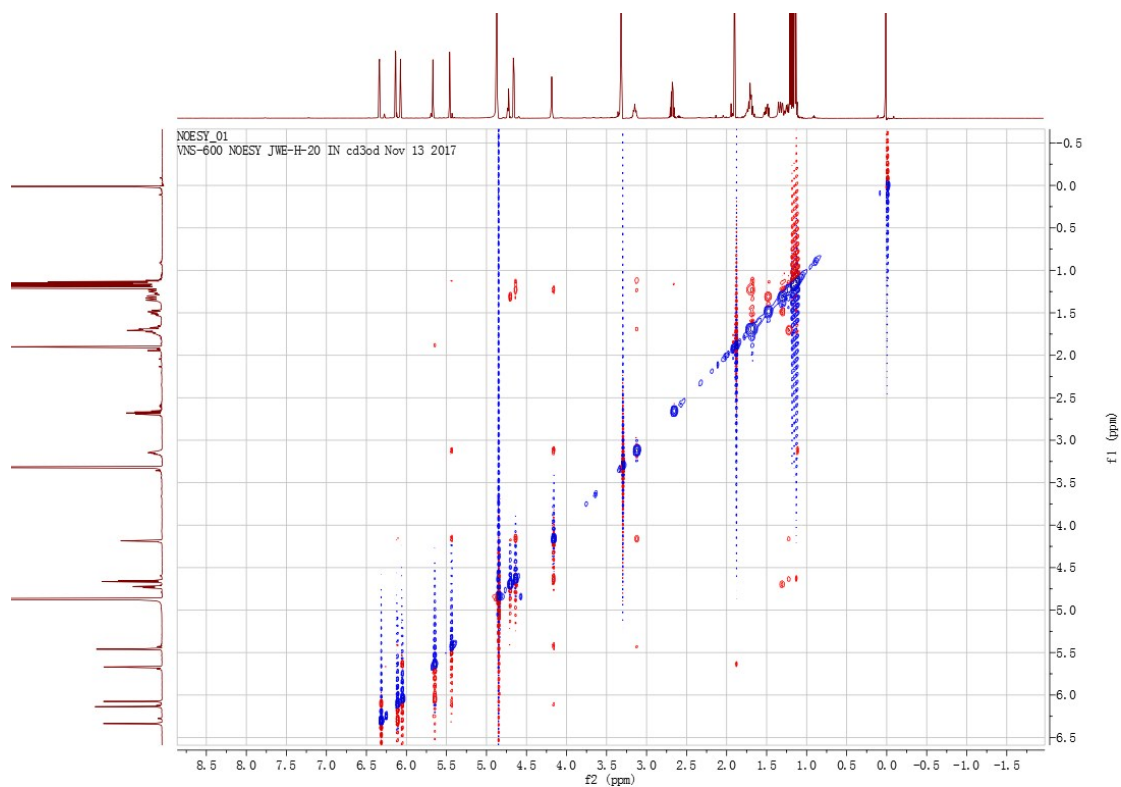

Fig. S2.6 NOESY spectrum (600 MHz) of compound **2** in CD<sub>3</sub>OD

Data Set: Storage 004614 - RawData - D:\2018\JCB-H-20.spc

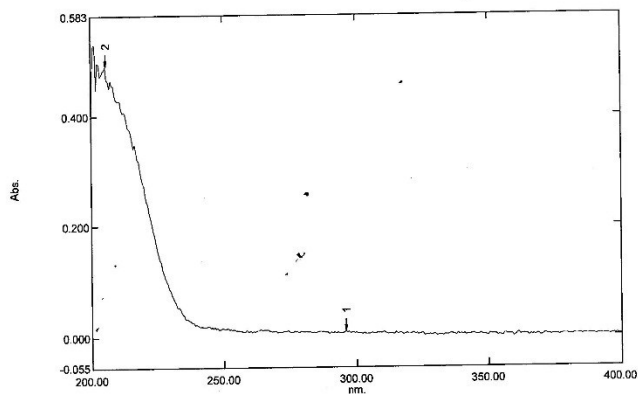

| No. | P/V | Wavelength | Abs.  | Description |
|-----|-----|------------|-------|-------------|
| 1   | ●   | 296.00     | 0.009 |             |
| 2   | ●   | 205.50     | 0.490 |             |

样品溶于 1.20ml MeOH  
旋光: -0.002°  
UV: 吸取 0.5ml → 3.0ml

Measurement Properties  
Wavelength Range (nm.): 200.00 to 400.00  
Scan Speed: Medium  
Sampling Interval: 0.5  
Auto Sampling Interval: Disabled  
Scan Mode: Single

Sample Preparation Properties  
Weight:  
Volume:

Fig. S2.7 UV spectrum of compound 2

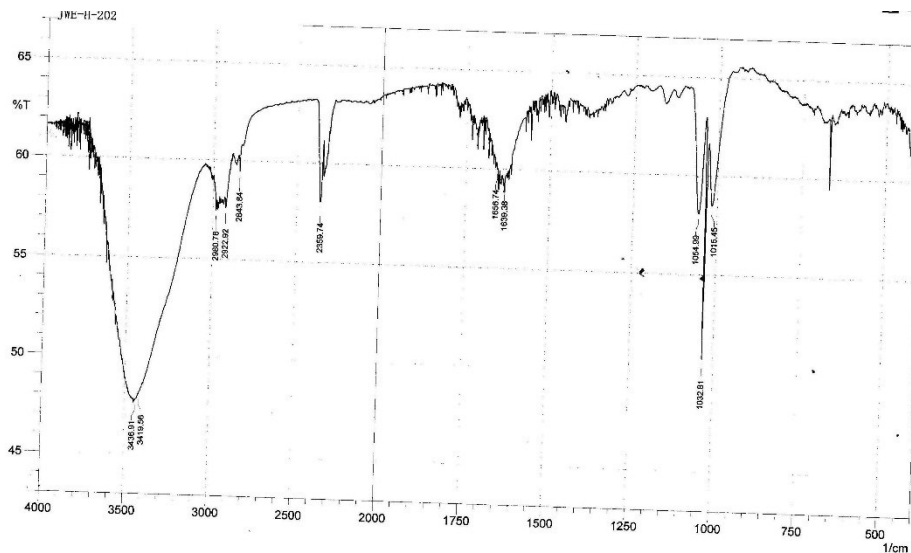

Fig. S2.8 IR spectrum of compound 2

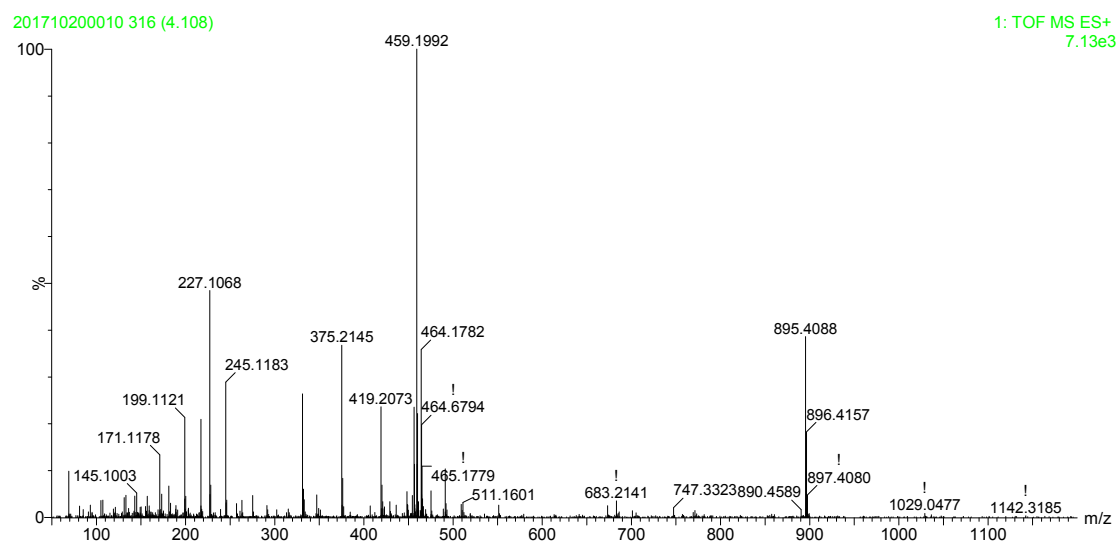

Fig. S2.9 HRESIMS spectrum of compound **2**

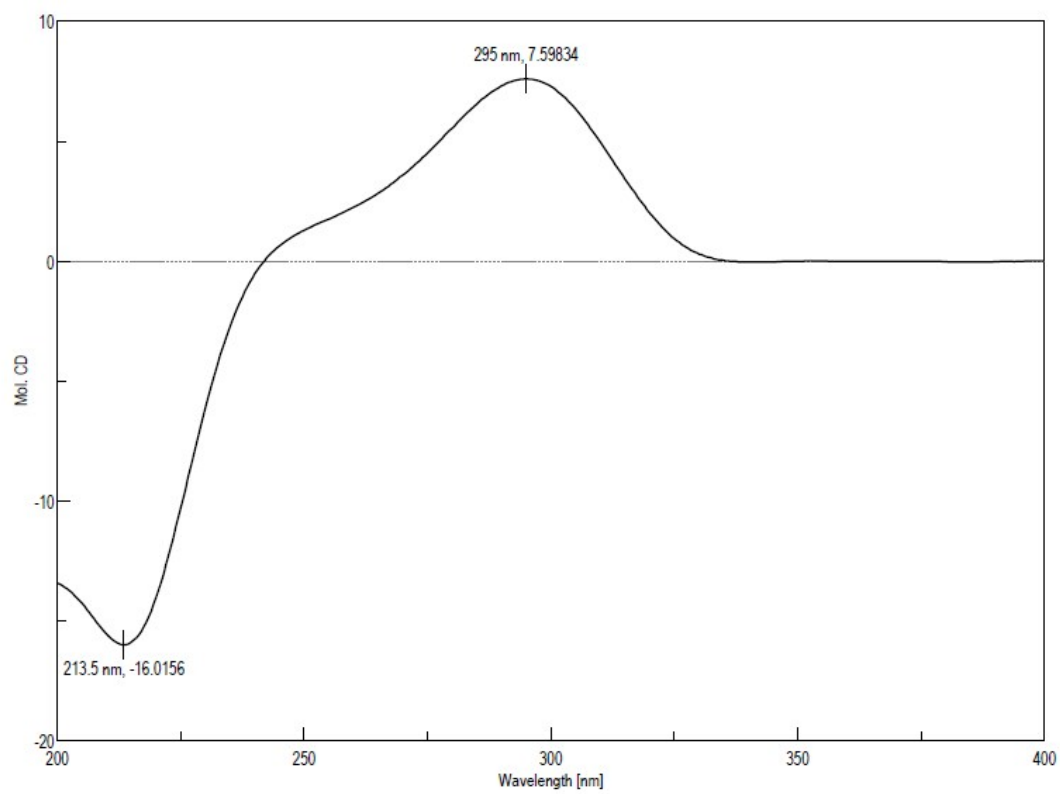

Fig. S2.10 CD spectrum of compound **2**

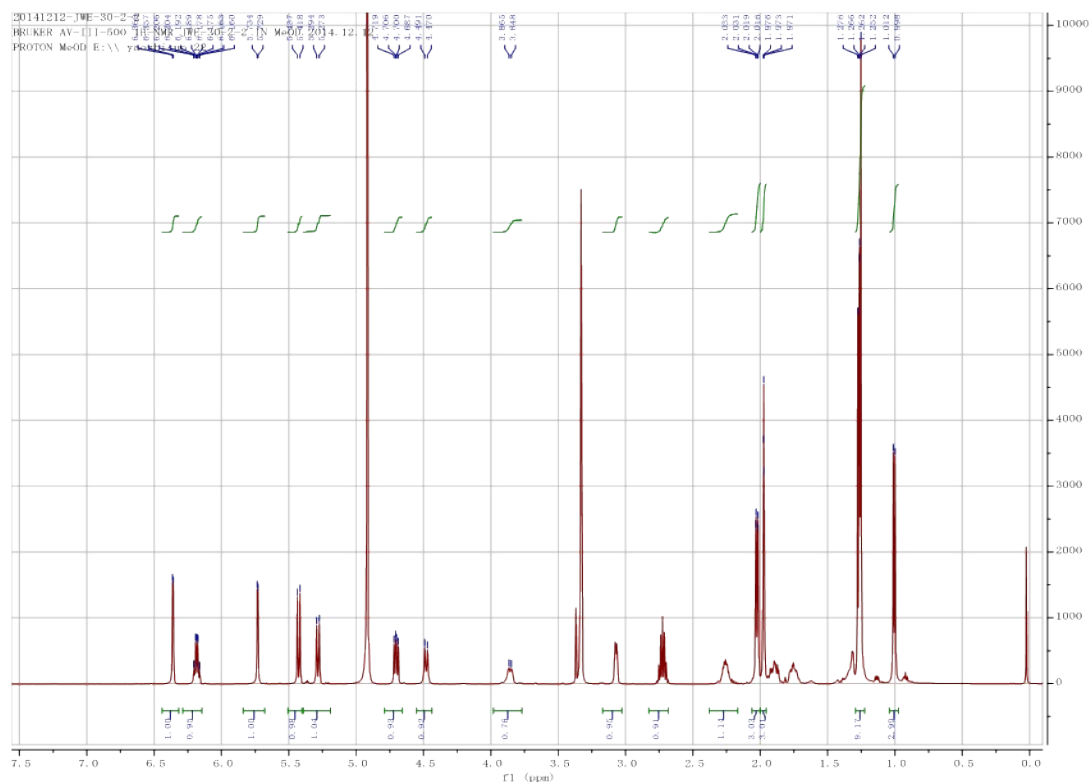

Fig. S3.1  $^1\text{H}$  NMR spectrum (600 MHz) of compound **3** in  $\text{CD}_3\text{OD}$

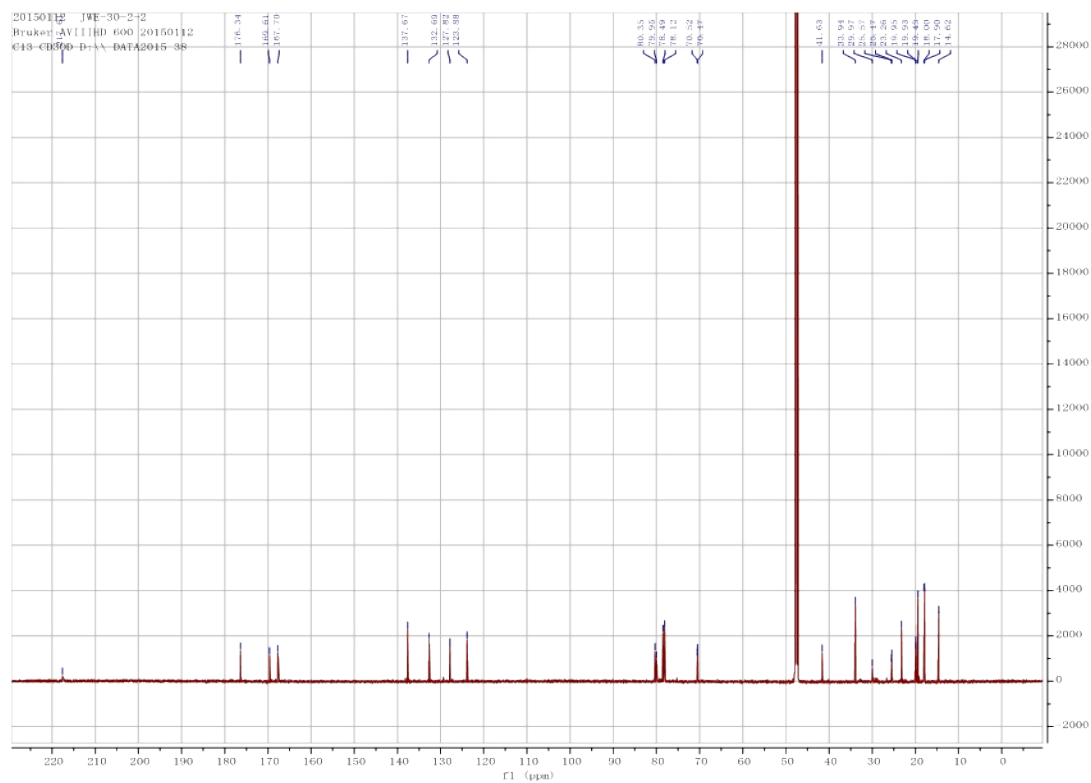

Fig. S3.2  $^{13}\text{C}$  NMR spectrum (150 MHz) of compound **3** in  $\text{CD}_3\text{OD}$

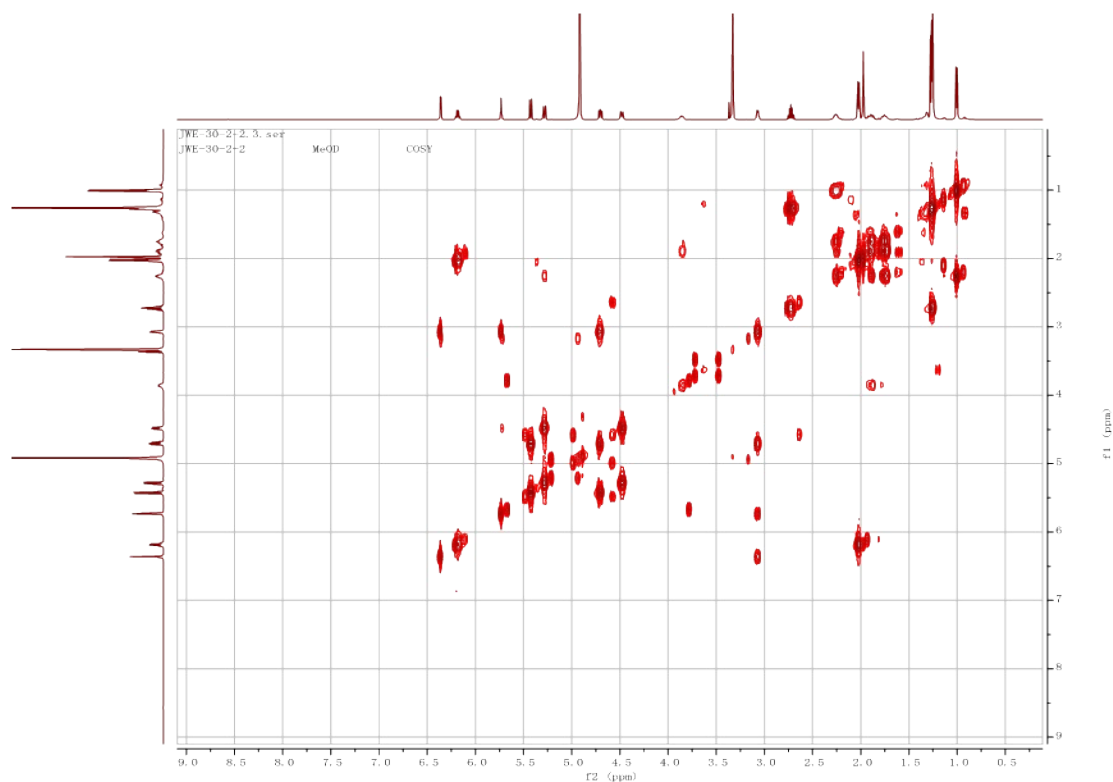

Fig. S3.3  $^1\text{H}$ - $^1\text{H}$  COSY spectrum (600 MHz) of compound **3** in  $\text{CD}_3\text{OD}$

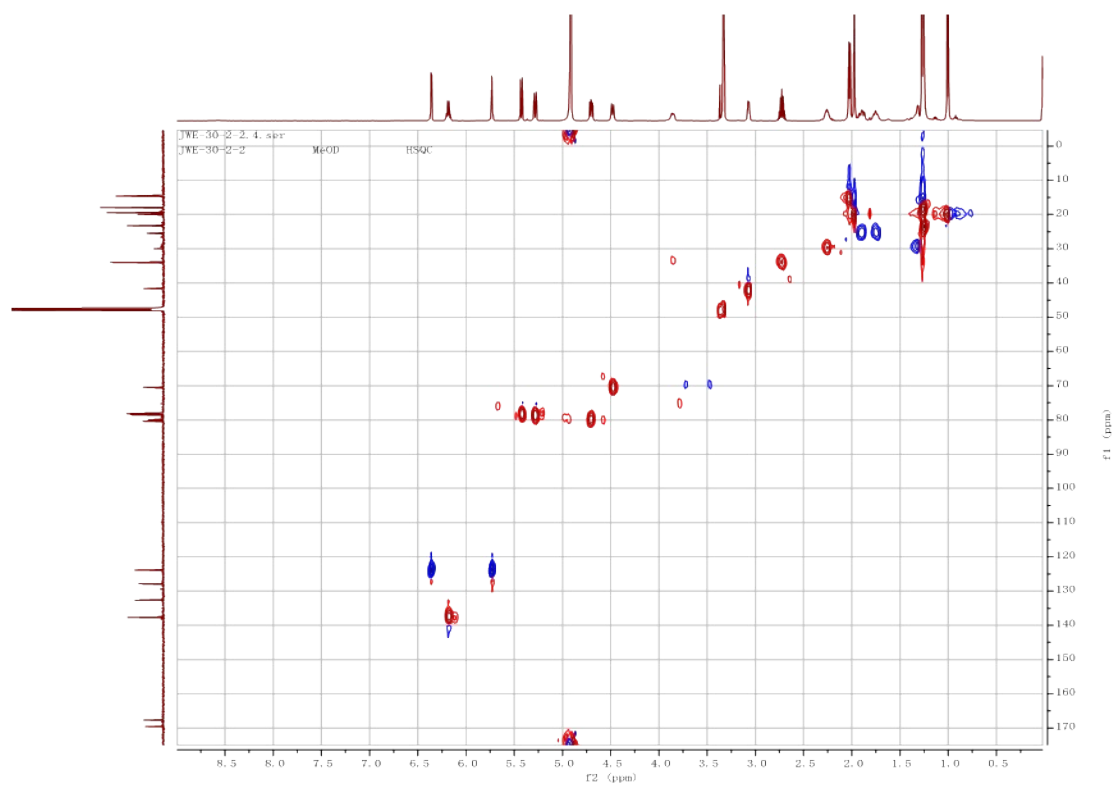

Fig. S3.4 HSQC spectrum (600 MHz) of compound **3** in  $\text{CD}_3\text{OD}$



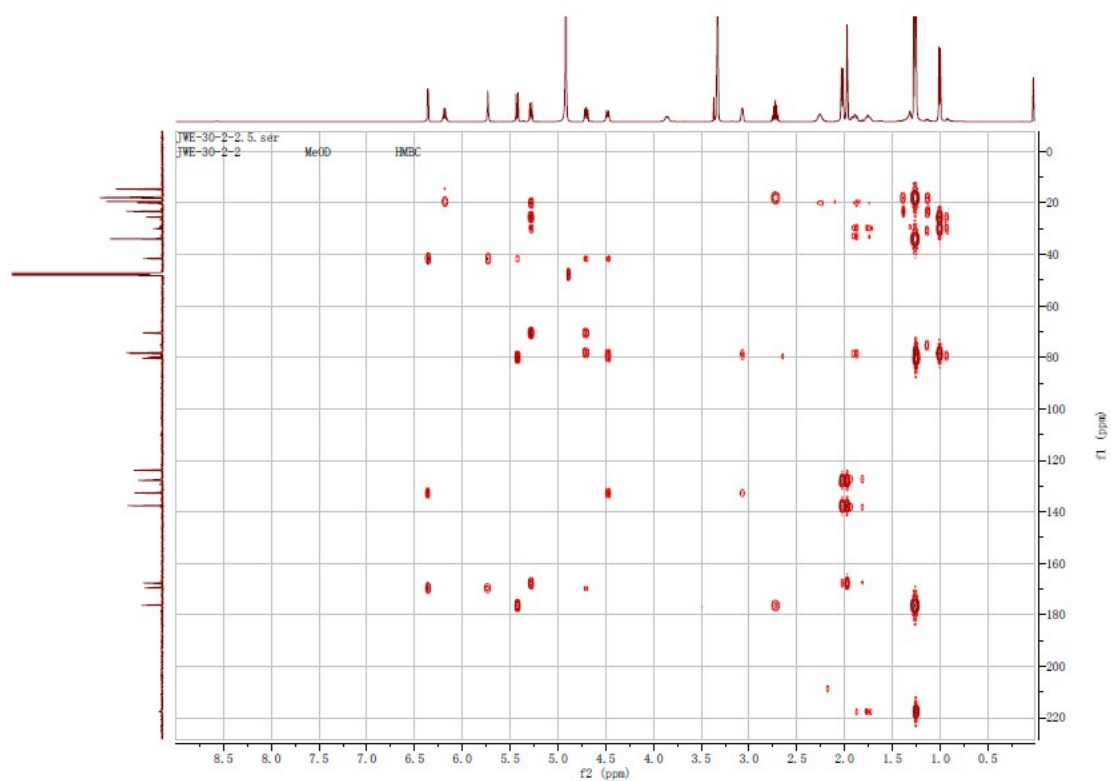

Fig. S3.5 HMBC spectrum (600 MHz) of compound **3** in CD<sub>3</sub>OD

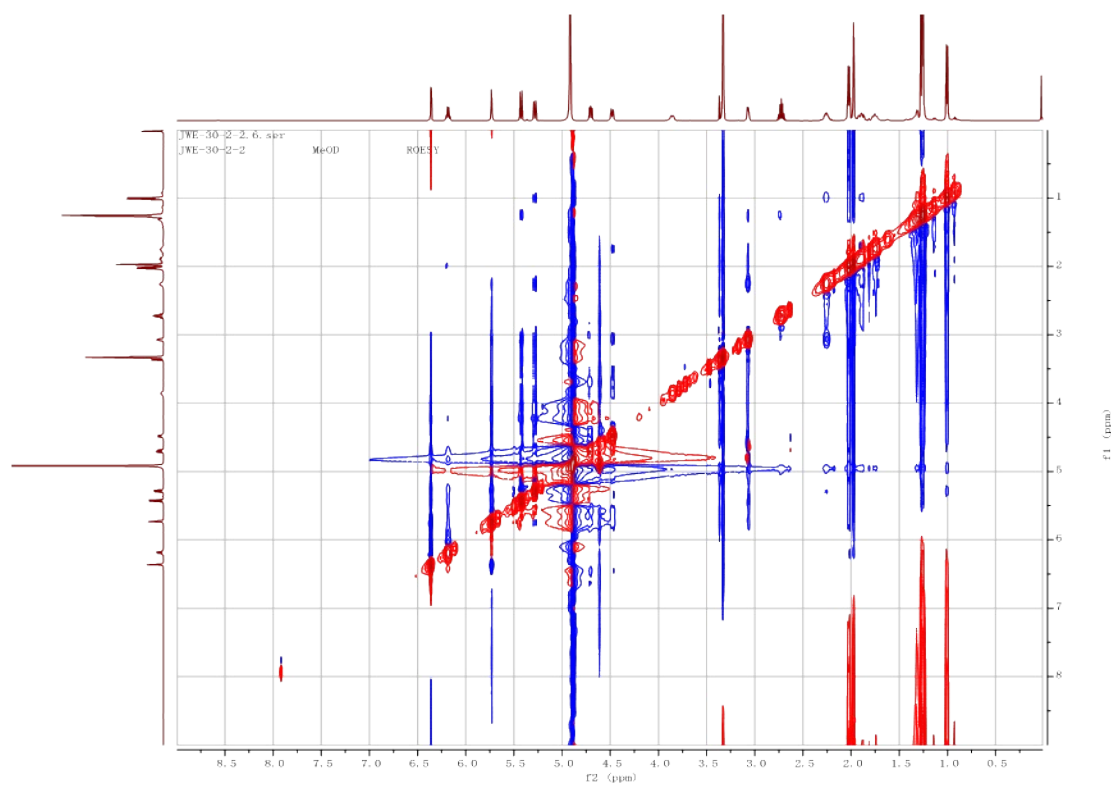

Fig. S3.6 ROESY spectrum (600 MHz) of compound **3** in CD<sub>3</sub>OD

1.5mg

Data Set: Storage 012536 - RawData - D:\2018\34-4.spc

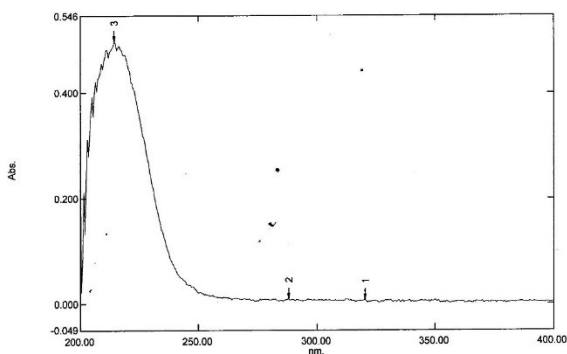

| No. | PIV | Wavelength | Abs.  | Description |
|-----|-----|------------|-------|-------------|
| 1   | ●   | 320.50     | 0.007 |             |
| 2   | ●   | 288.50     | 0.008 |             |
| 3   | ●   | 214.50     | 0.496 |             |

样品溶于2.0ml MeOH  
旋光: -0.015°  
UV: 吸取0.5ml → 3ml.

Measurement Properties  
Wavelength Range (nm.): 200.00 to 400.00  
Scan Speed: Medium  
Sampling Interval: 0.5  
Auto Sampling Interval: Disabled  
Scan Mode: Single

Sample Preparation Properties  
Weight:  
Volume:

Fig. S3.7 UV spectrum of compound 3

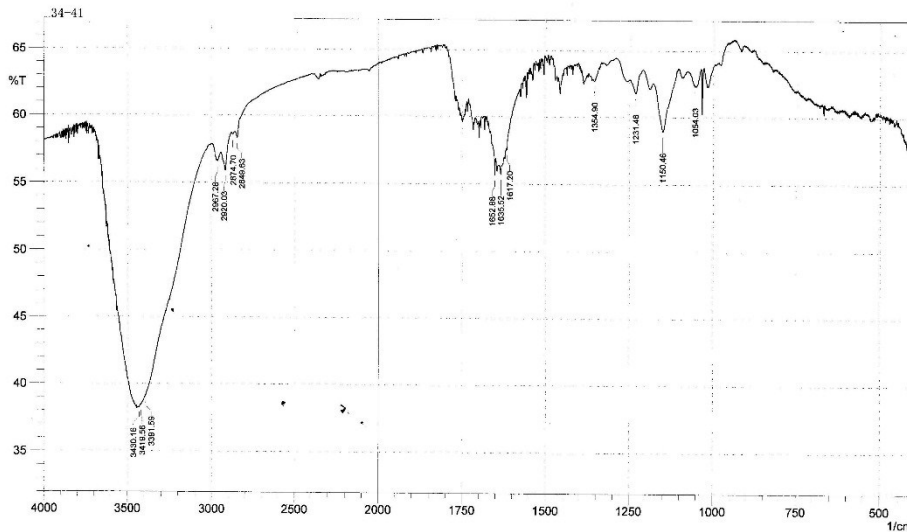

Fig. S3.8 IR spectrum of compound 3

ZT\_JWE\_34\_4

20141102\_037 501 (6.512) Cm (500:503)

1: TOF MS ES+  
8.88e5

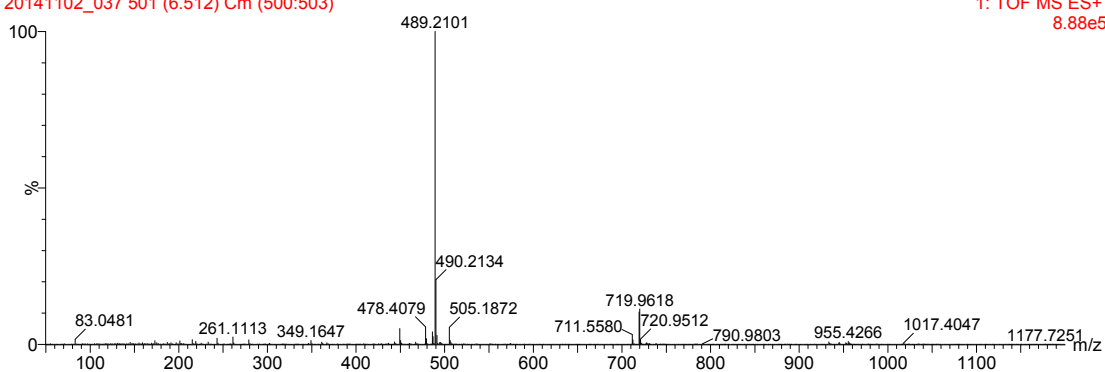

Fig. S3.9 HRESIMS spectrum of compound **3**

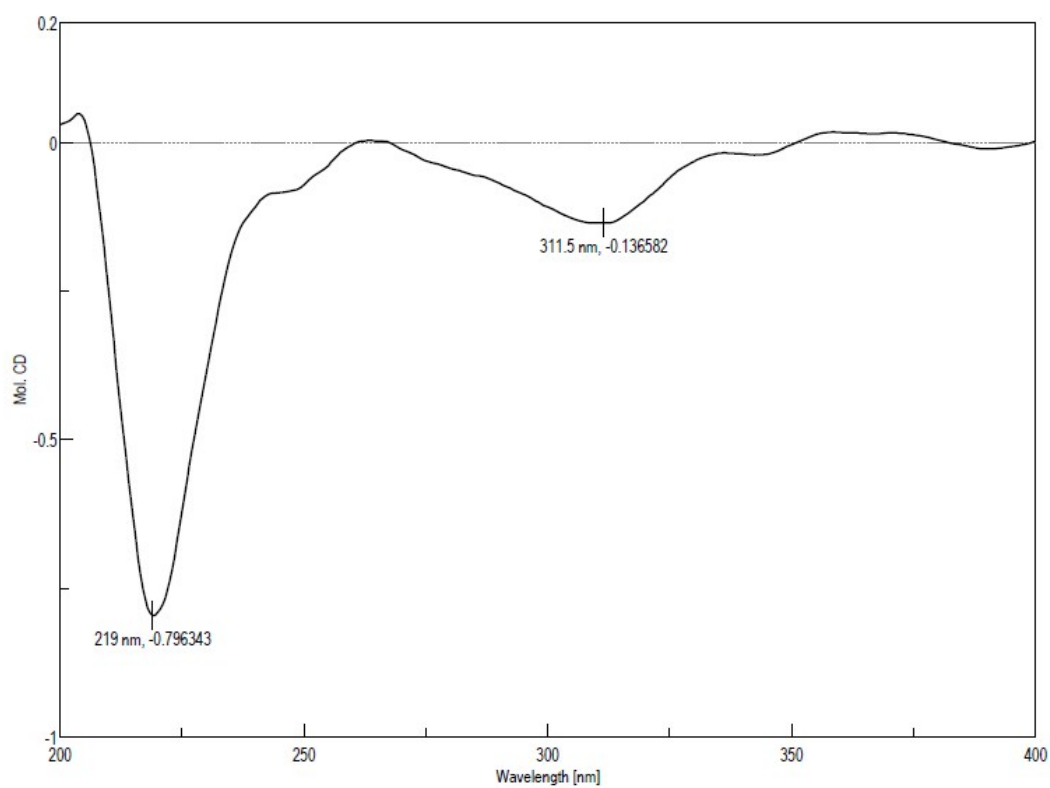

Fig. S3.10 CD spectrum of compound **3**

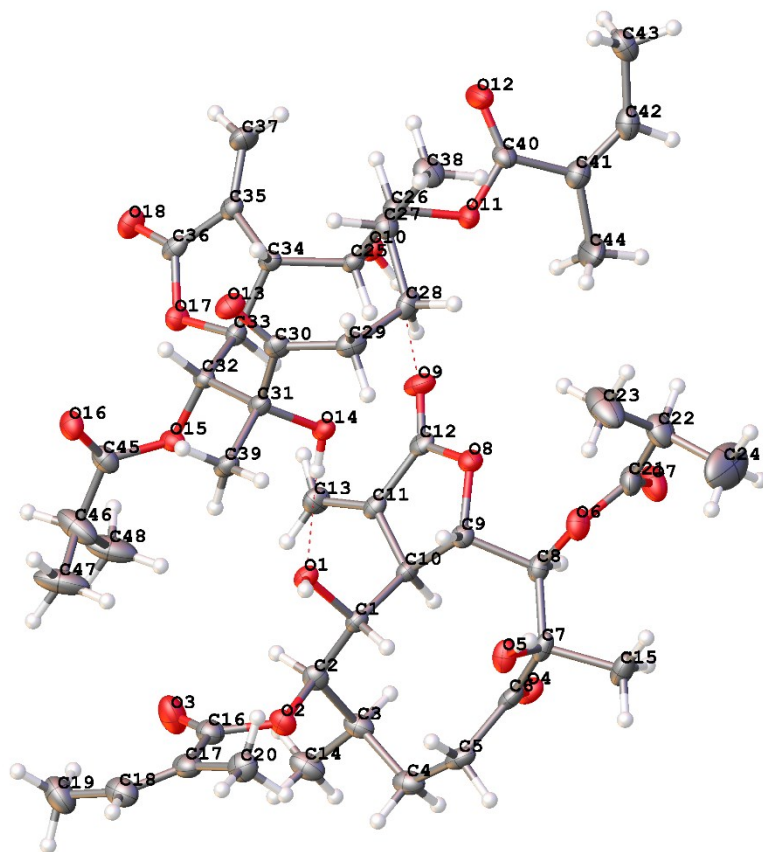

Fig. S3.11 X-ray ORTEP drawing of **3**

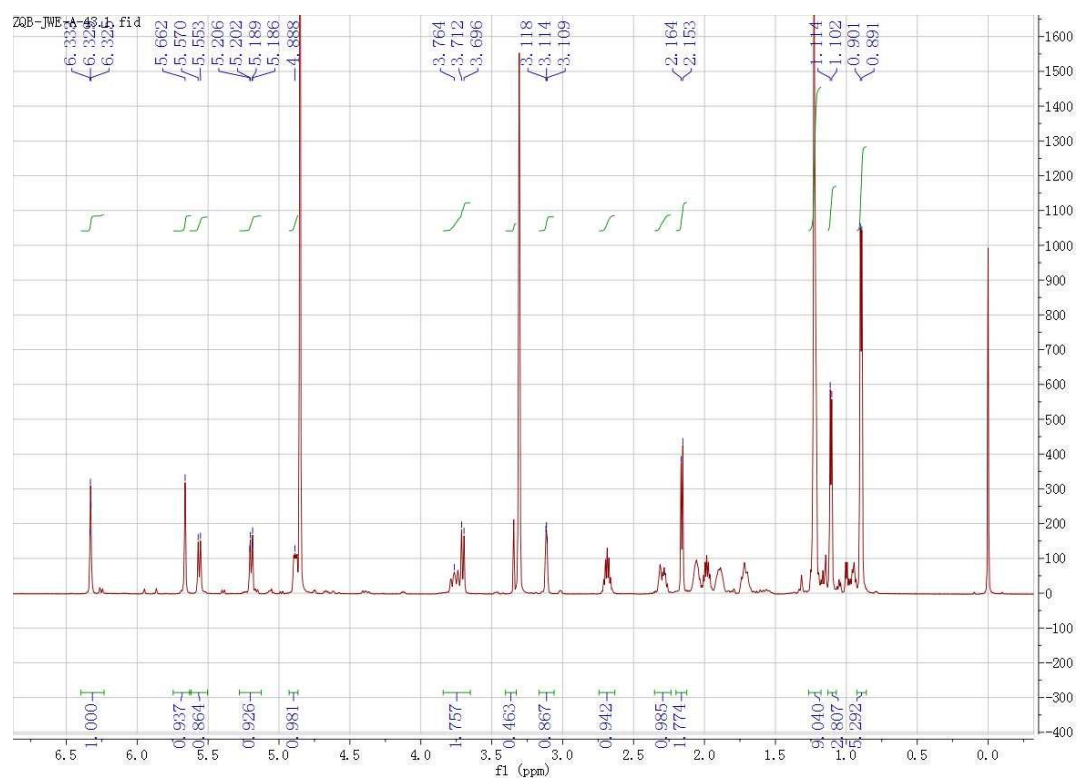

Fig. S4.1  $^1\text{H}$  NMR spectrum (500 MHz) of compound **4** in  $\text{CD}_3\text{OD}$

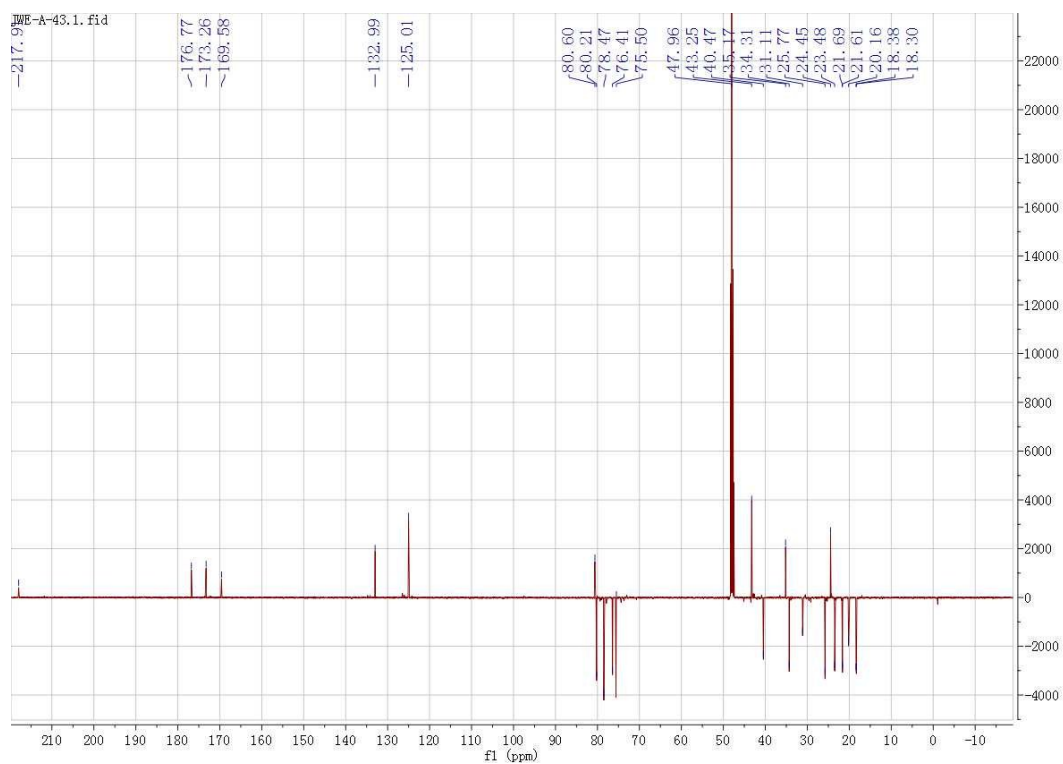

Fig. S4.2 <sup>13</sup>C NMR spectrum (125 MHz) of compound 4 in CD<sub>3</sub>OD

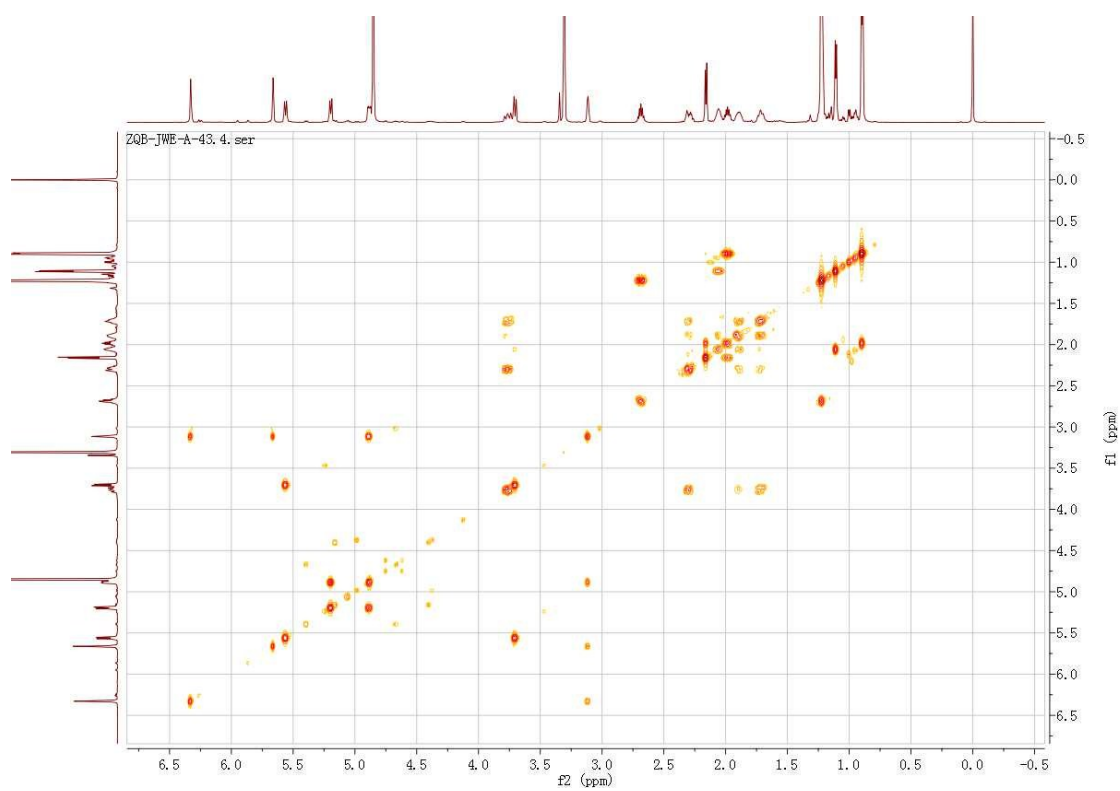

Fig. S4.3 <sup>1</sup>H-<sup>1</sup>H COSY spectrum (500 MHz) of compound 4 in CD<sub>3</sub>OD

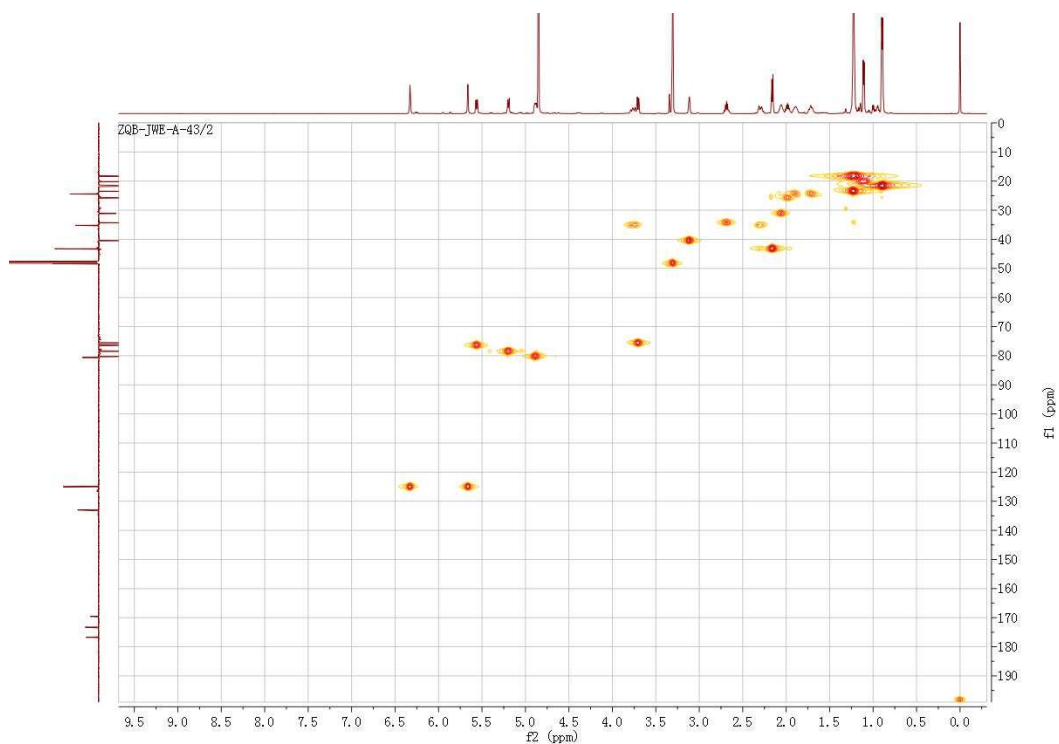

Fig. S4.4 HSQC spectrum (500 MHz) of compound **4** in CD<sub>3</sub>OD

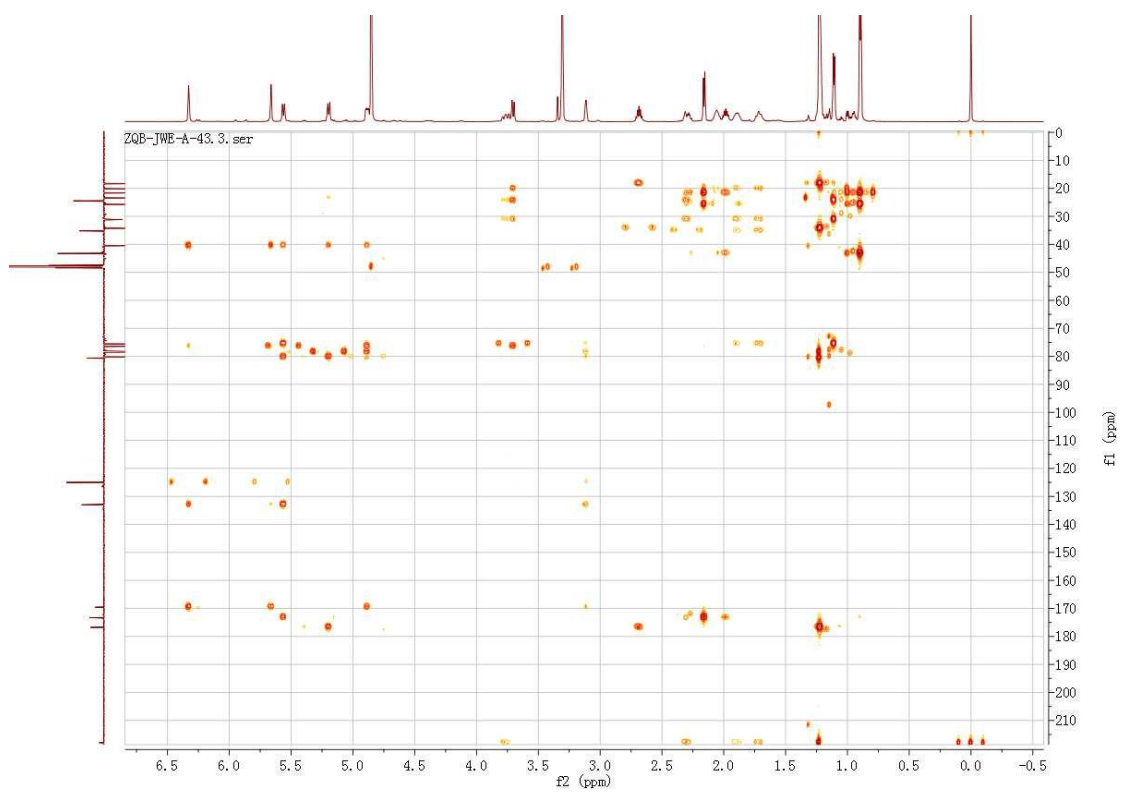

Fig. S4.5 HMBC spectrum (500 MHz) of compound **4** in CD<sub>3</sub>OD

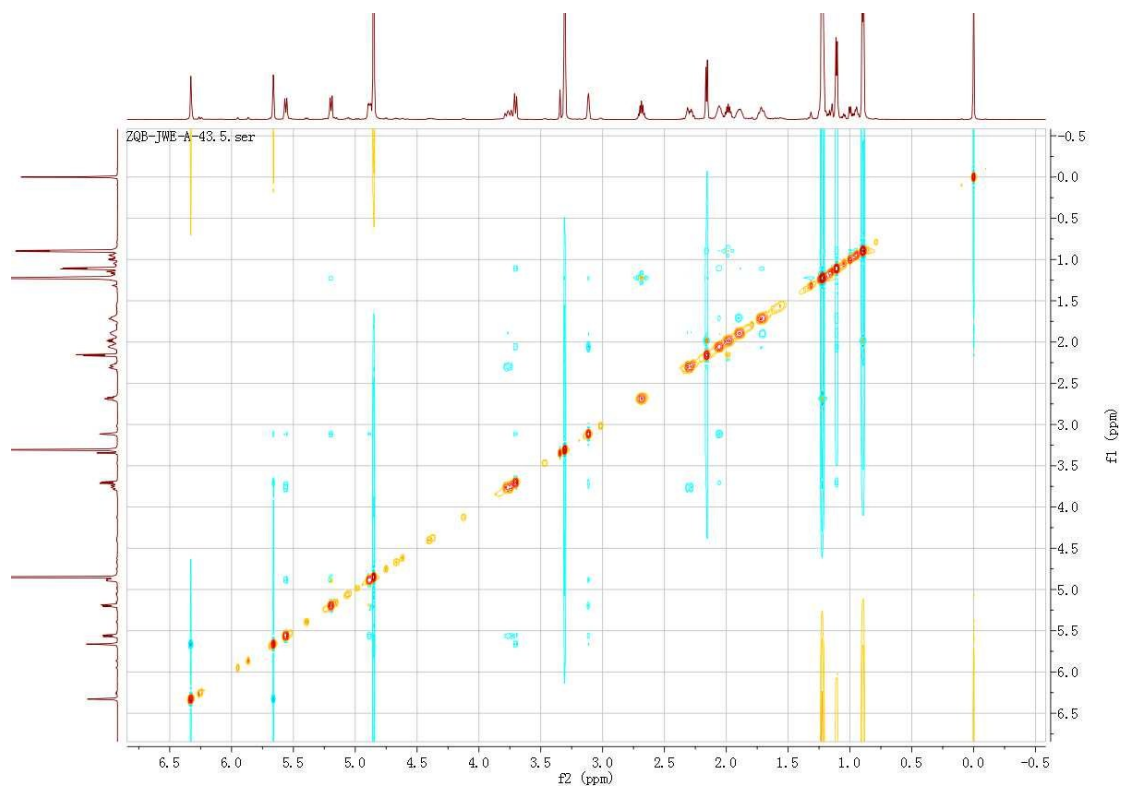

Fig. S4.6 ROESY spectrum (500 MHz) of compound **4** in CD<sub>3</sub>OD

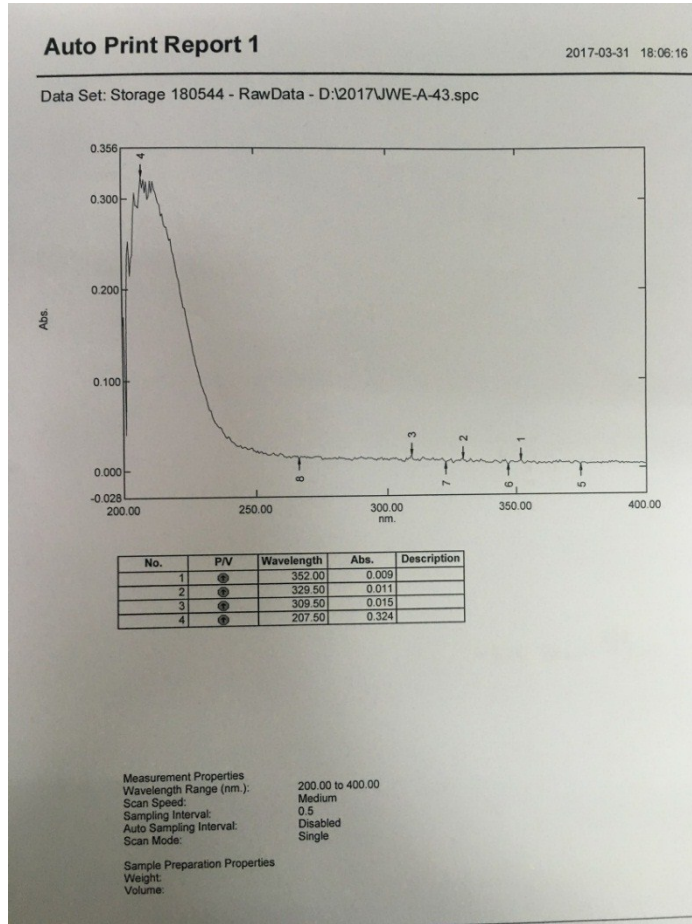

Fig. S4.7 UV spectrum of compound 4

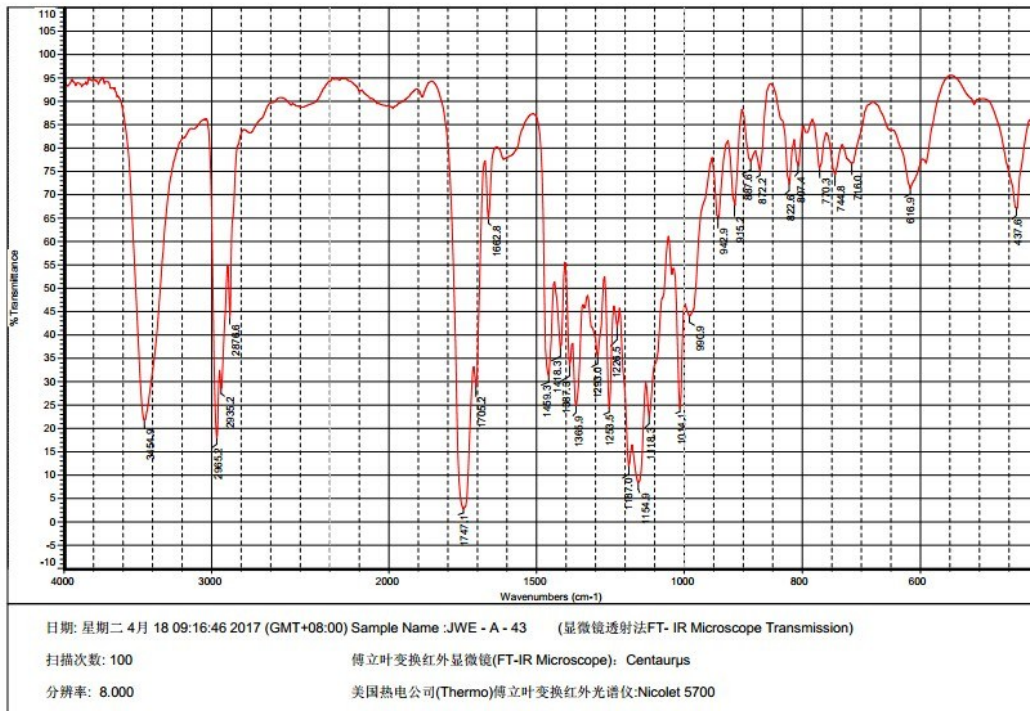

Fig. S4.8 IR spectrum of compound 4



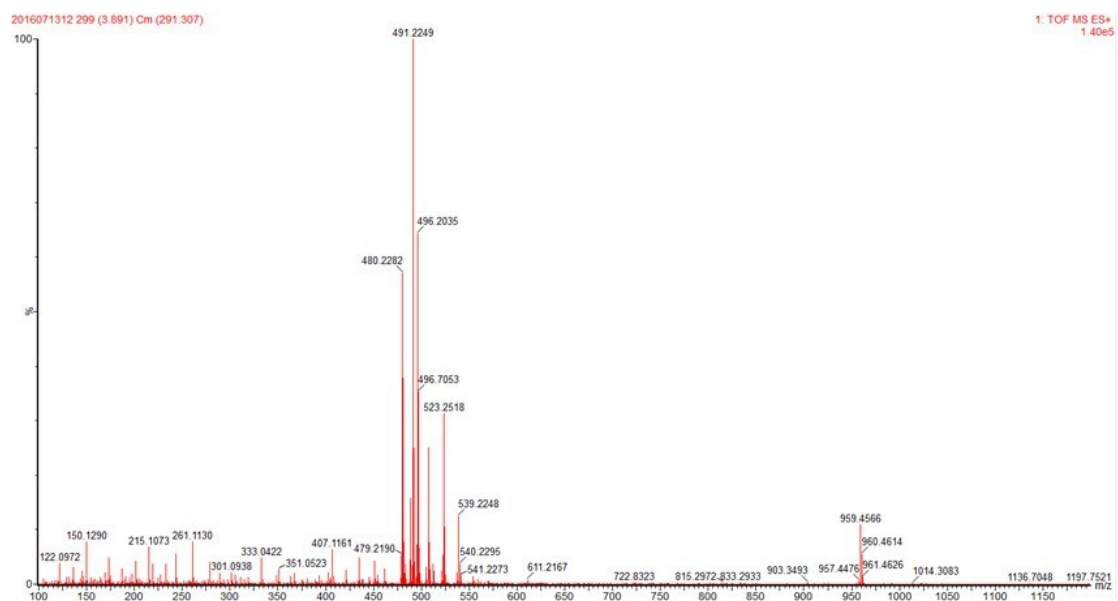

Fig. S4.9 HRESIMS spectrum of compound 4

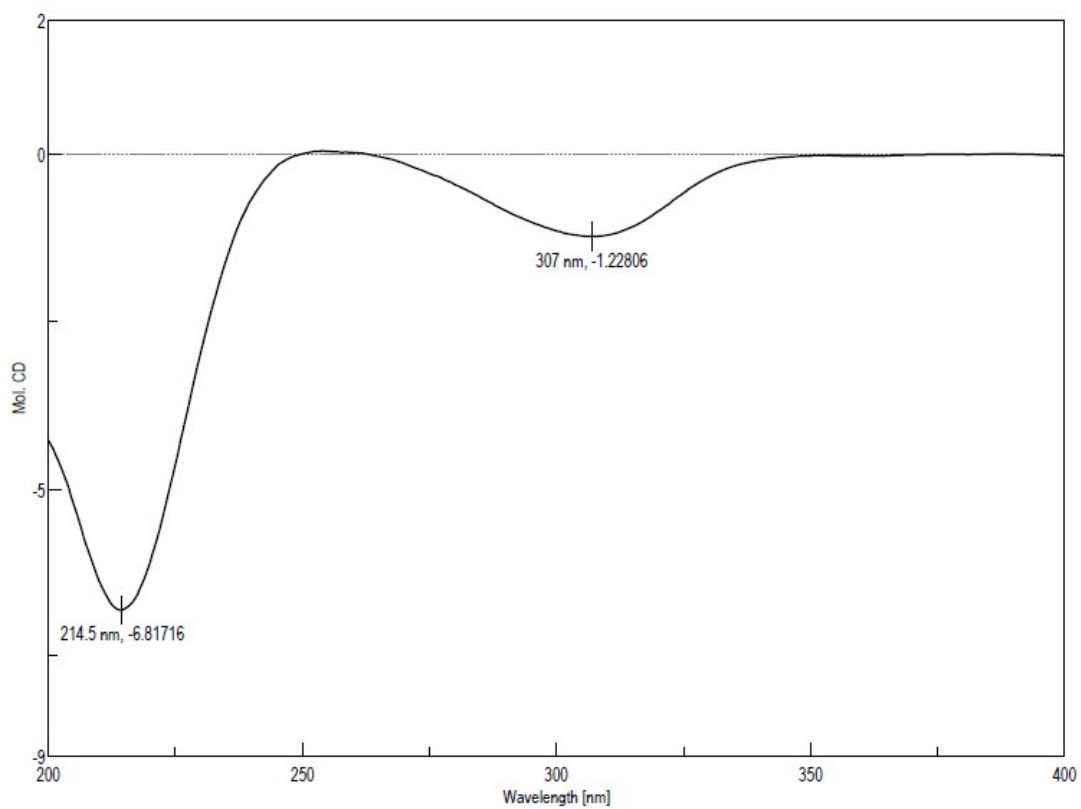

Fig. S4.10 CD spectrum of compound 4

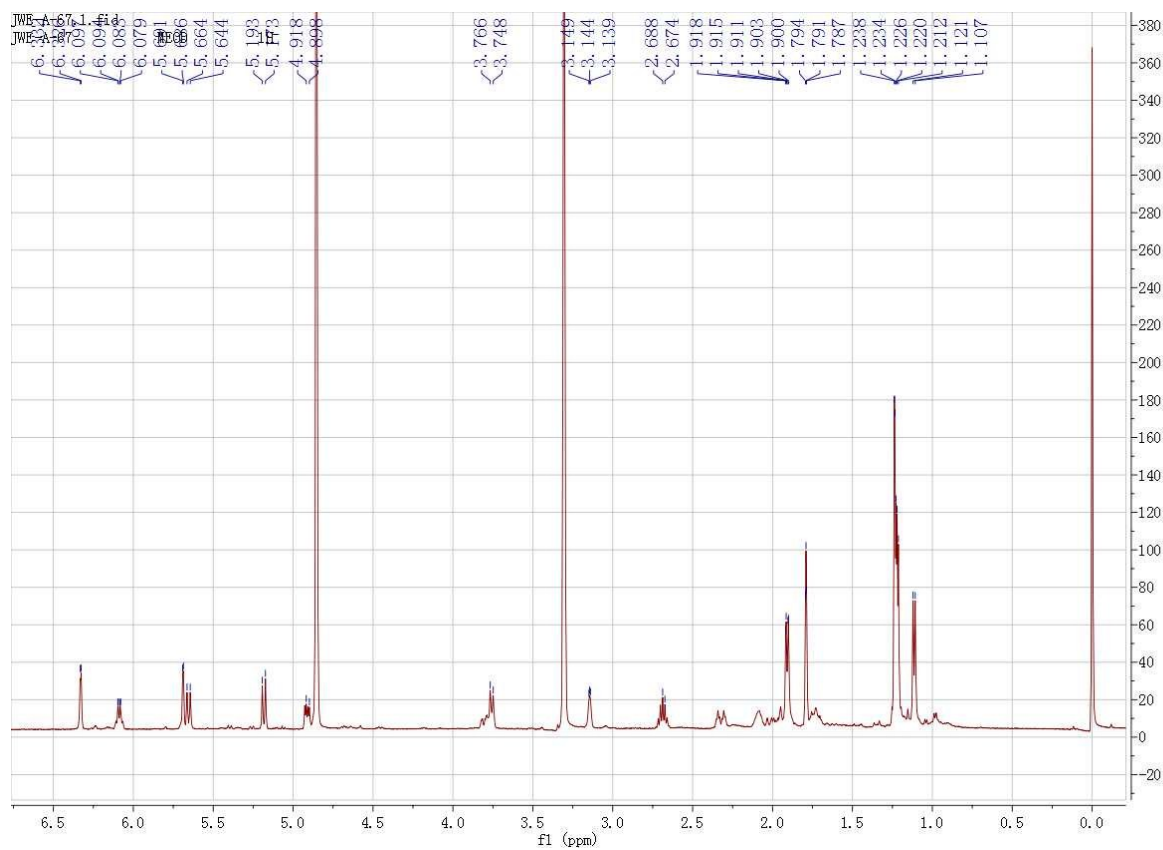

Fig. S5.1  $^1\text{H}$  NMR spectrum (500 MHz) of compound **5** in  $\text{CD}_3\text{OD}$

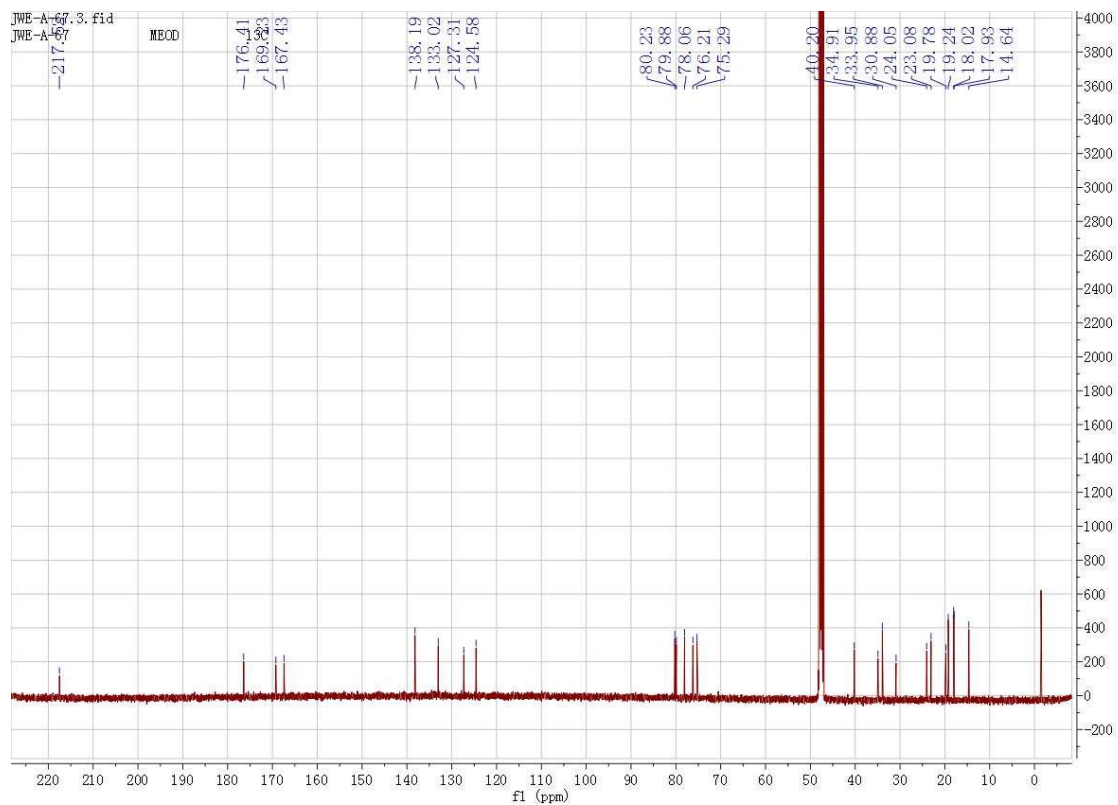

Fig. S5.2  $^{13}\text{C}$  NMR spectrum (500 MHz) of compound **5** in  $\text{CD}_3\text{OD}$

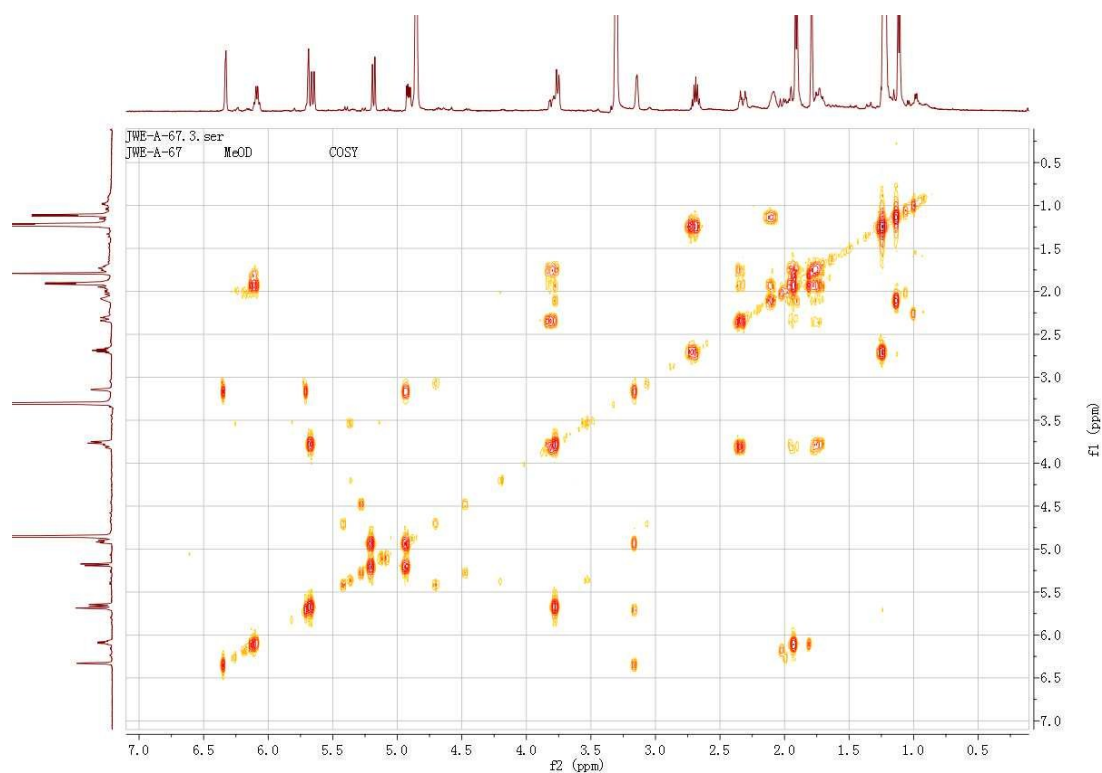

Fig. S5.3  $^1\text{H}$ - $^1\text{H}$  COSY spectrum (500 MHz) of compound **5** in  $\text{CD}_3\text{OD}$

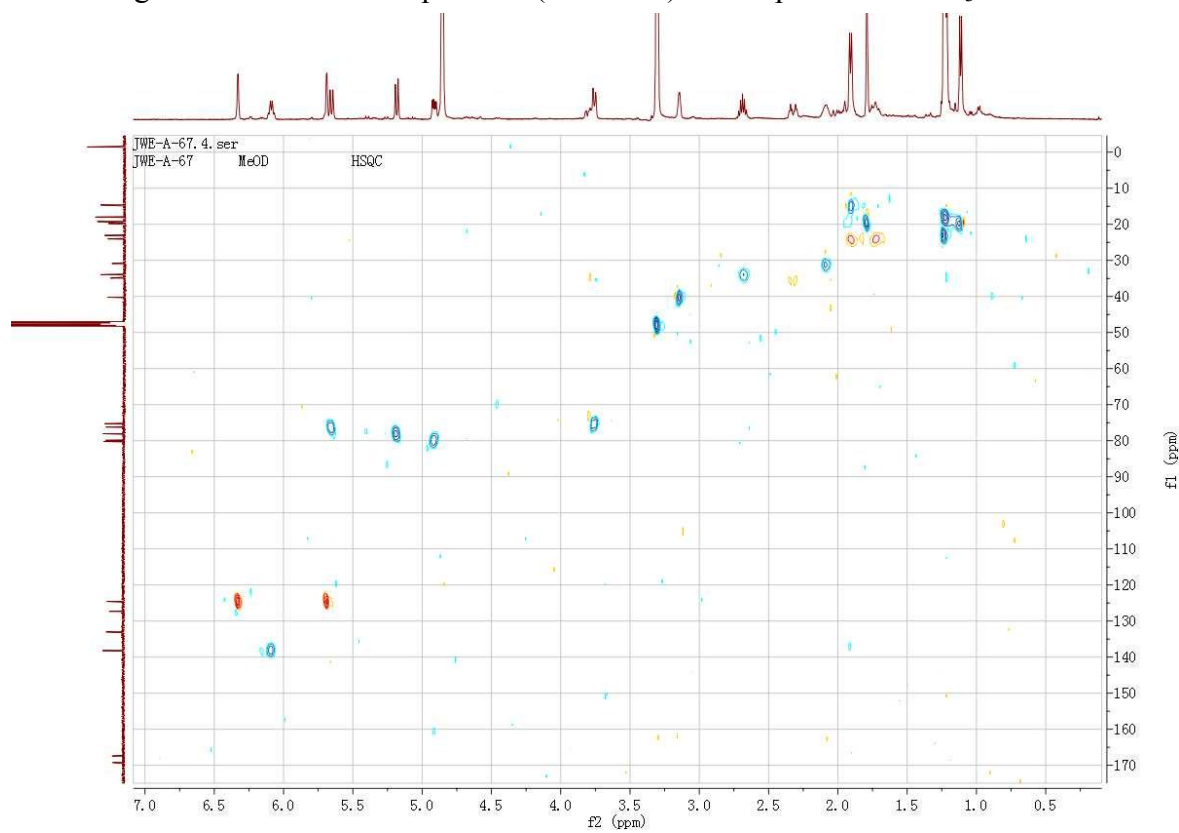

Fig. S5.4 HSQC spectrum (500 MHz) of compound **5** in  $\text{CD}_3\text{OD}$

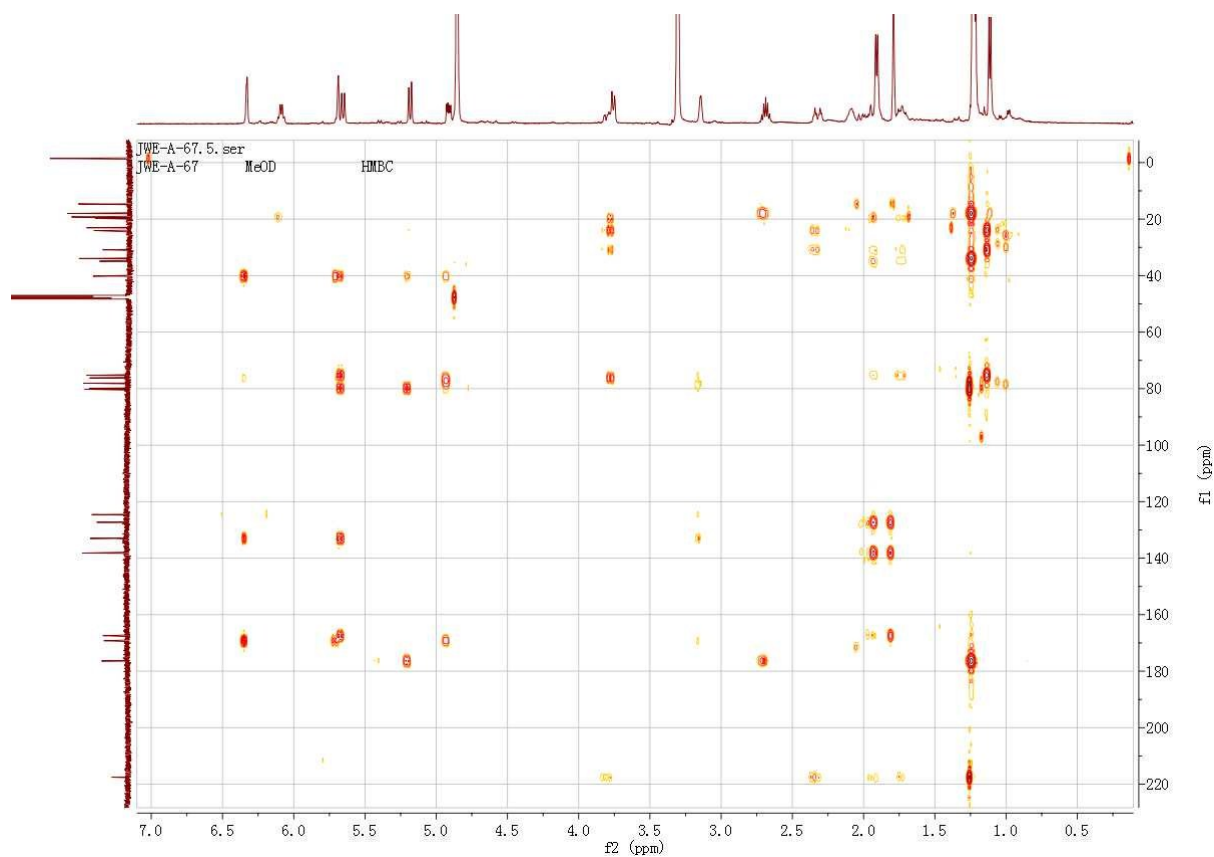

Fig. S5.5 HMBC spectrum (500 MHz) of compound **5** in CD<sub>3</sub>OD

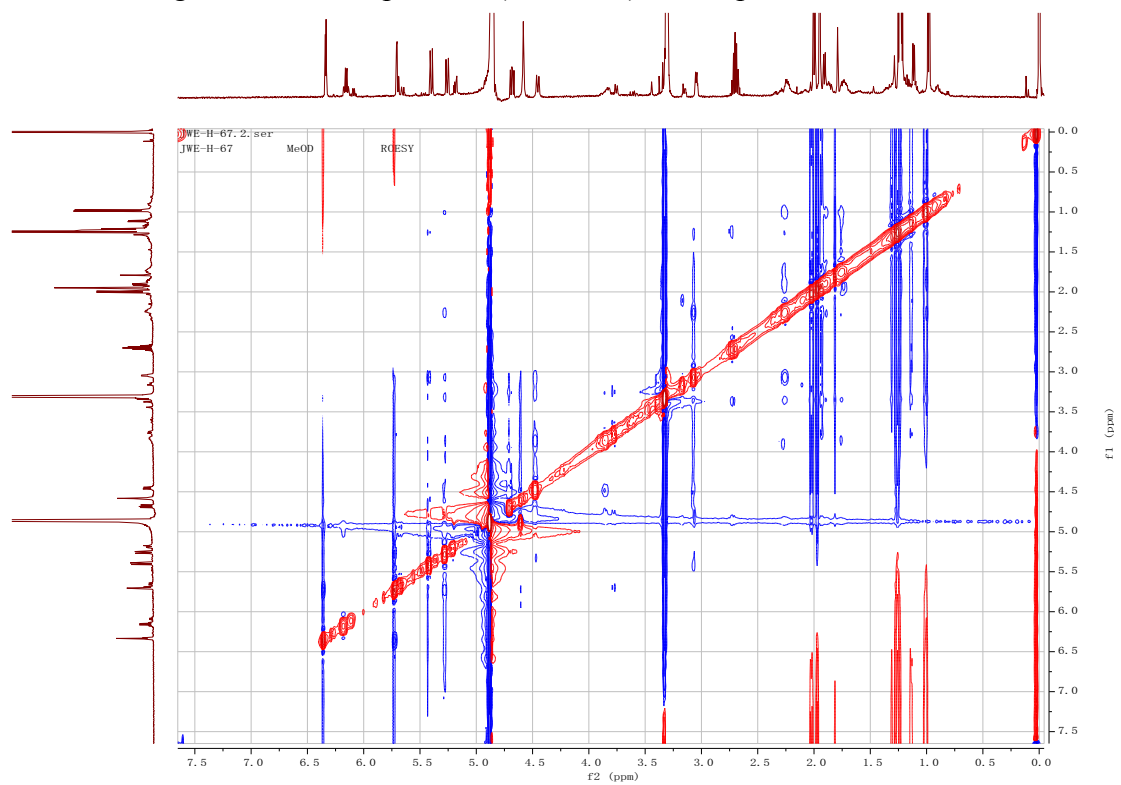

Fig. S5.6 ROESY spectrum (500 MHz) of compound **5** in CD<sub>3</sub>OD

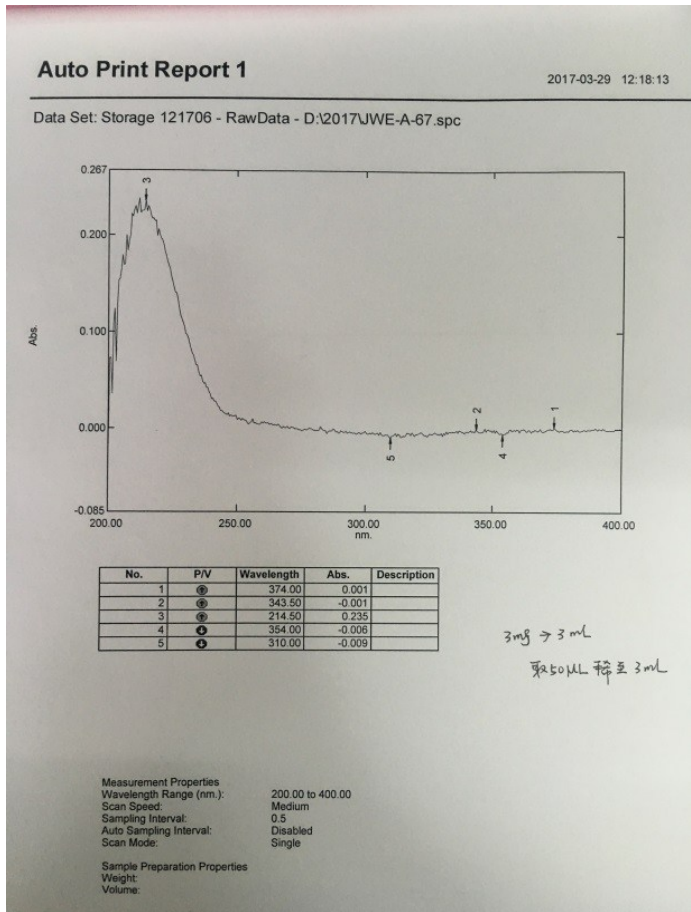

Fig. S5.7 UV spectrum of compound 5

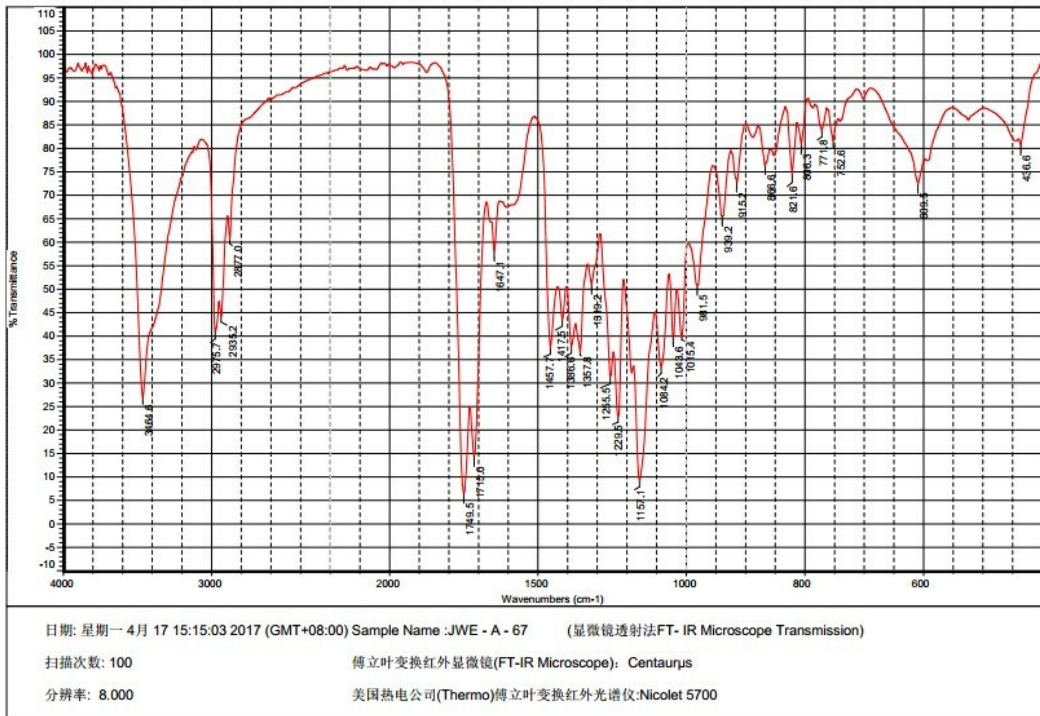

Fig. S5.8 IR spectrum of compound 5

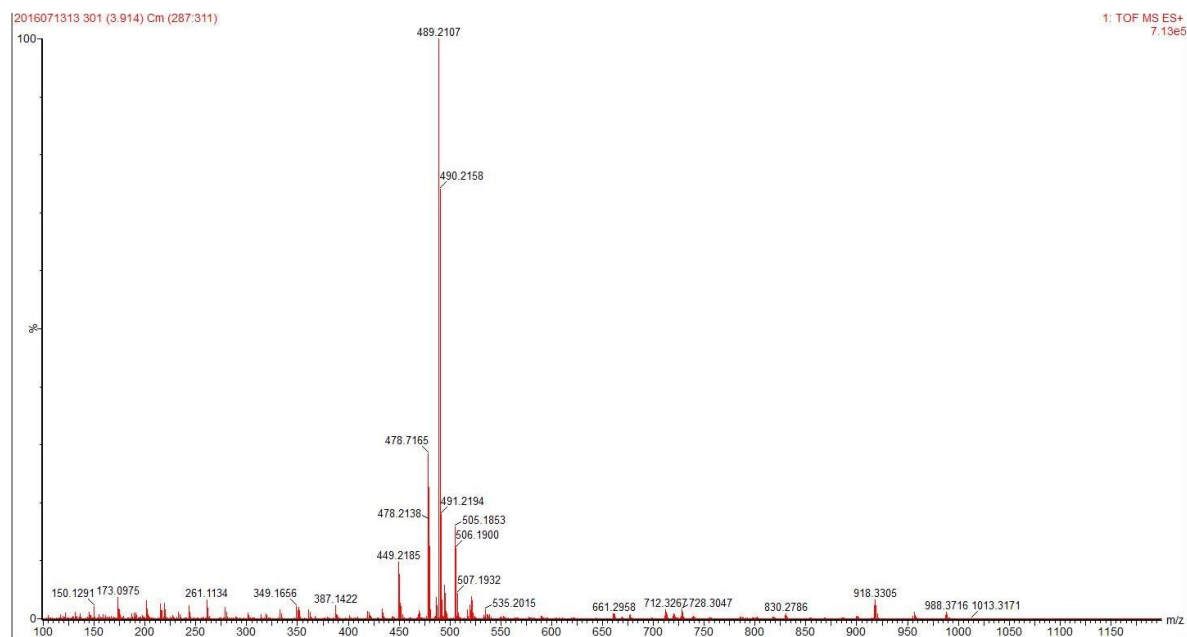

Fig. S5.9 HRESIMS spectrum of compound **5**

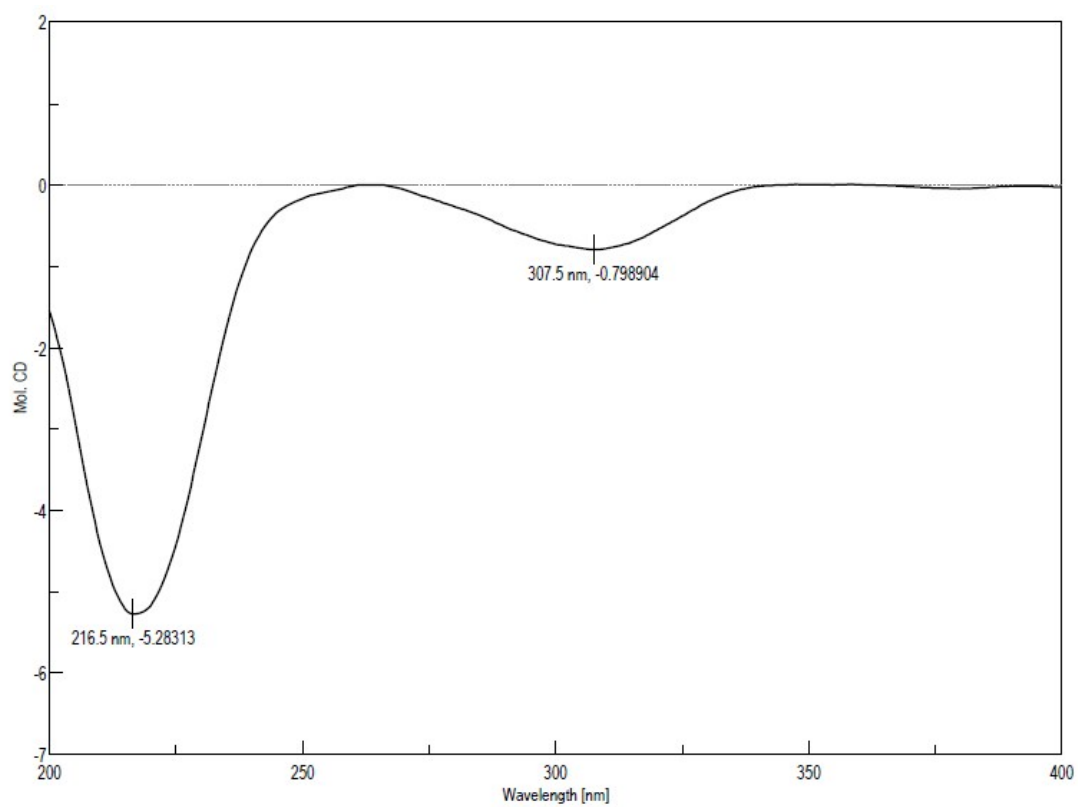

Fig. S5.10 CD spectrum of compound **5**

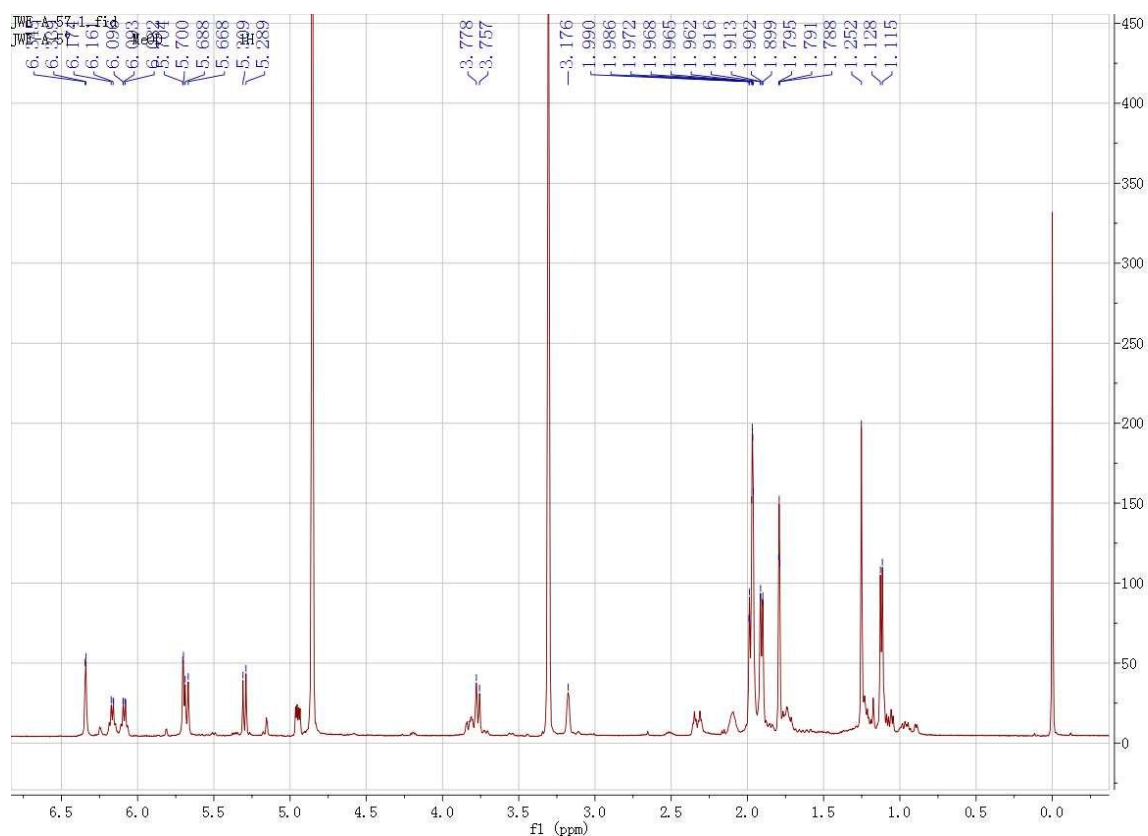

Fig. S6.1  $^1\text{H}$  NMR spectrum (500 MHz) of compound **6** in  $\text{CD}_3\text{OD}$

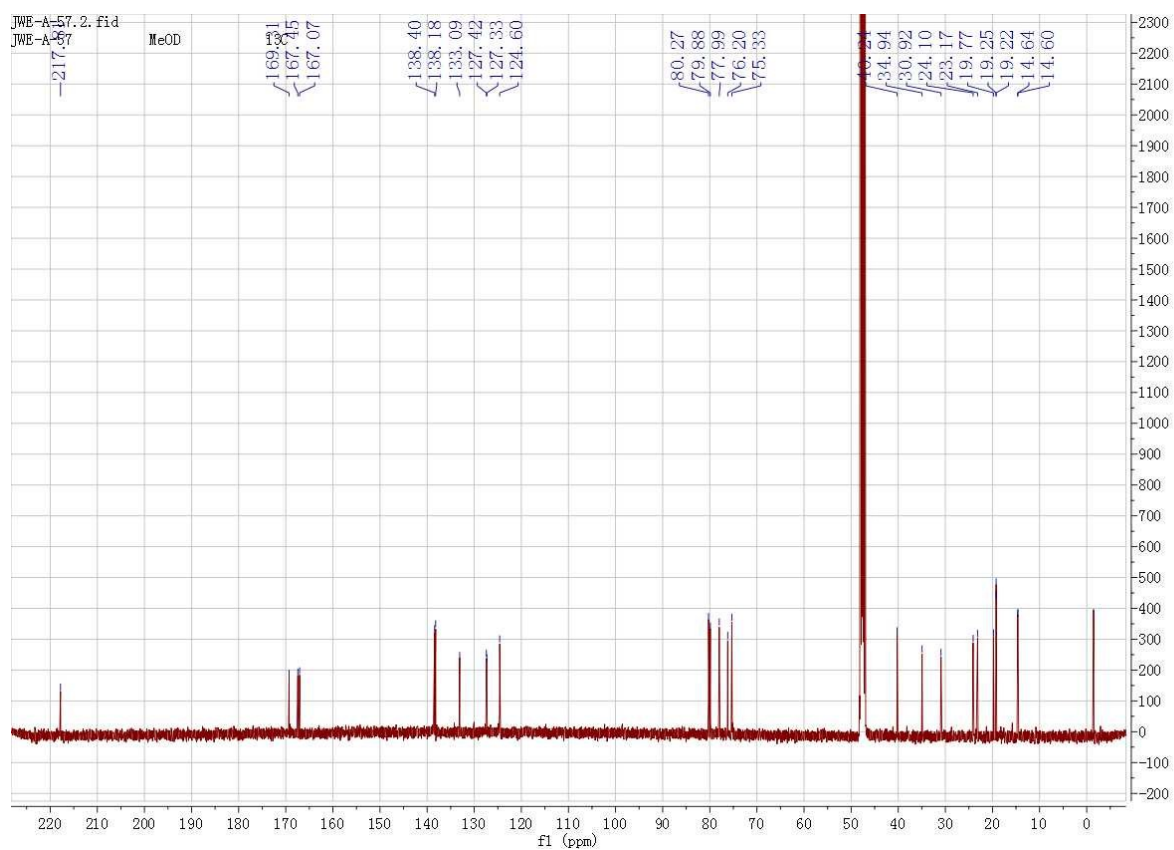

Fig. S6.2  $^{13}\text{C}$  NMR spectrum (125 MHz) of compound **6** in  $\text{CD}_3\text{OD}$

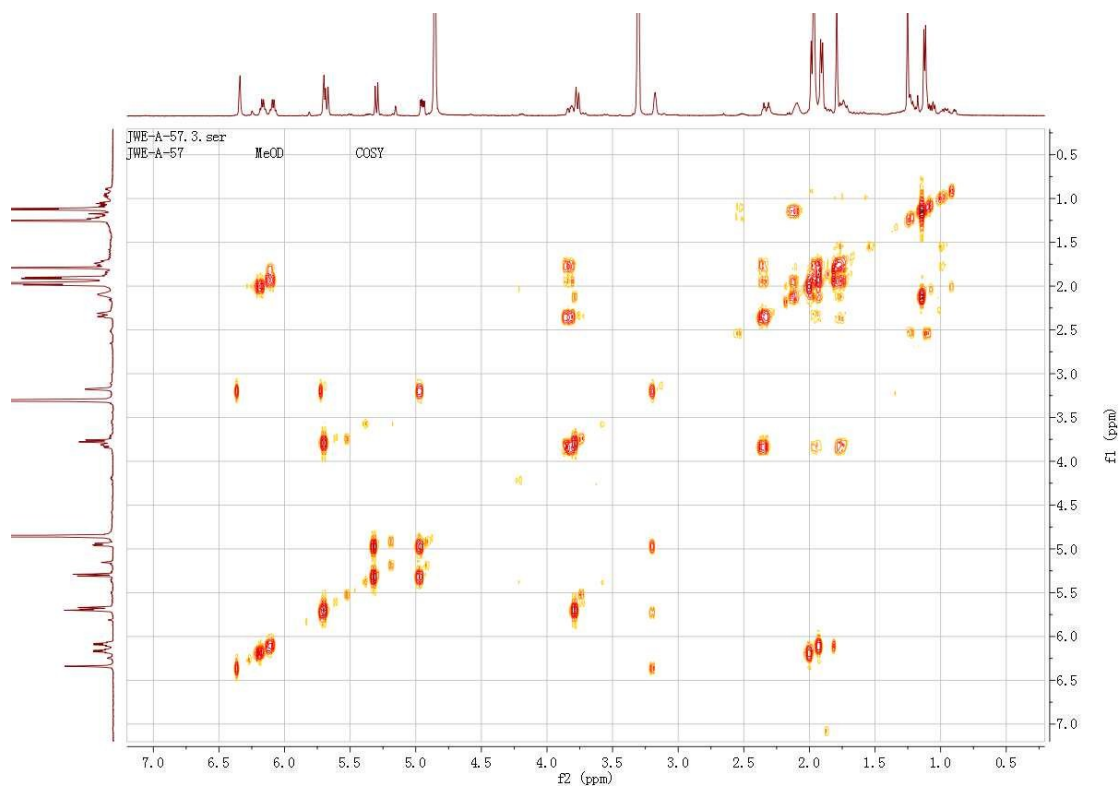

Fig. S6.3  $^1\text{H}$ - $^1\text{H}$  COSY spectrum (500 MHz) of compound **6** in  $\text{CD}_3\text{OD}$

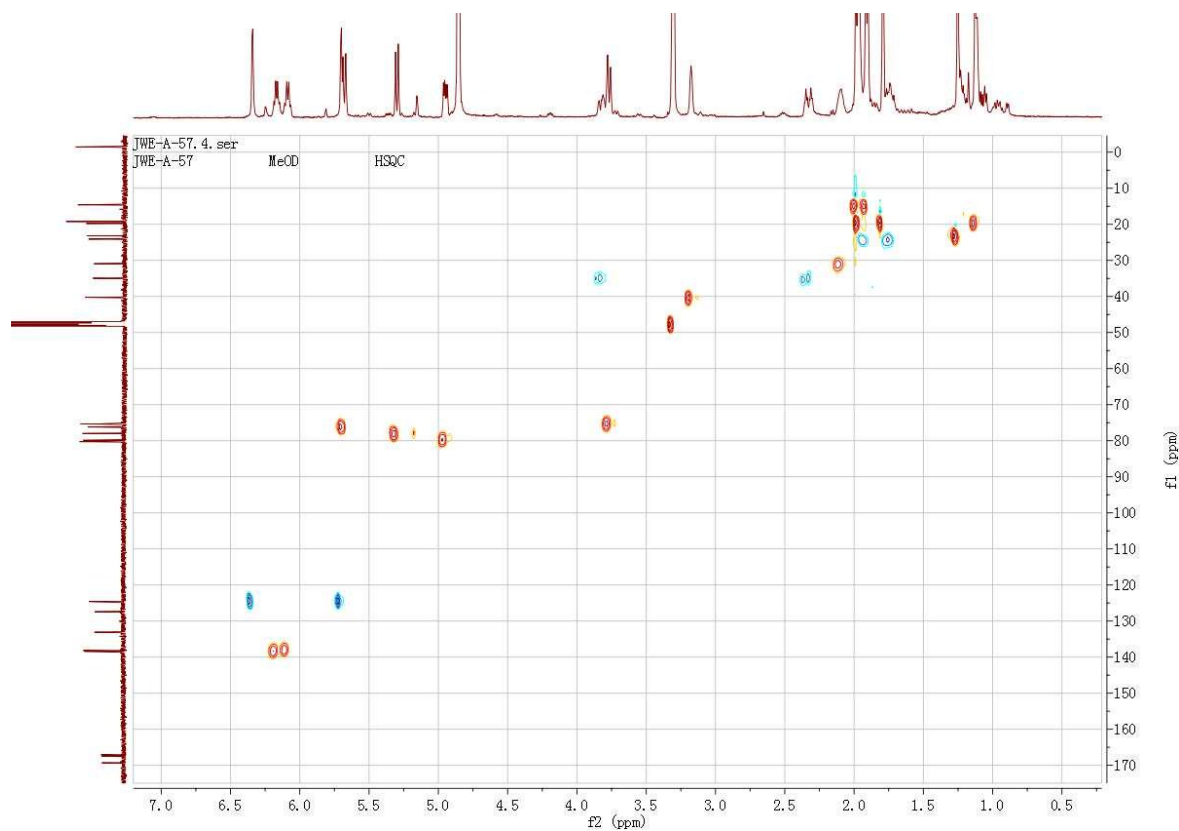

Fig. S6.4 HSQC spectrum (500 MHz) of compound **6** in  $\text{CD}_3\text{OD}$



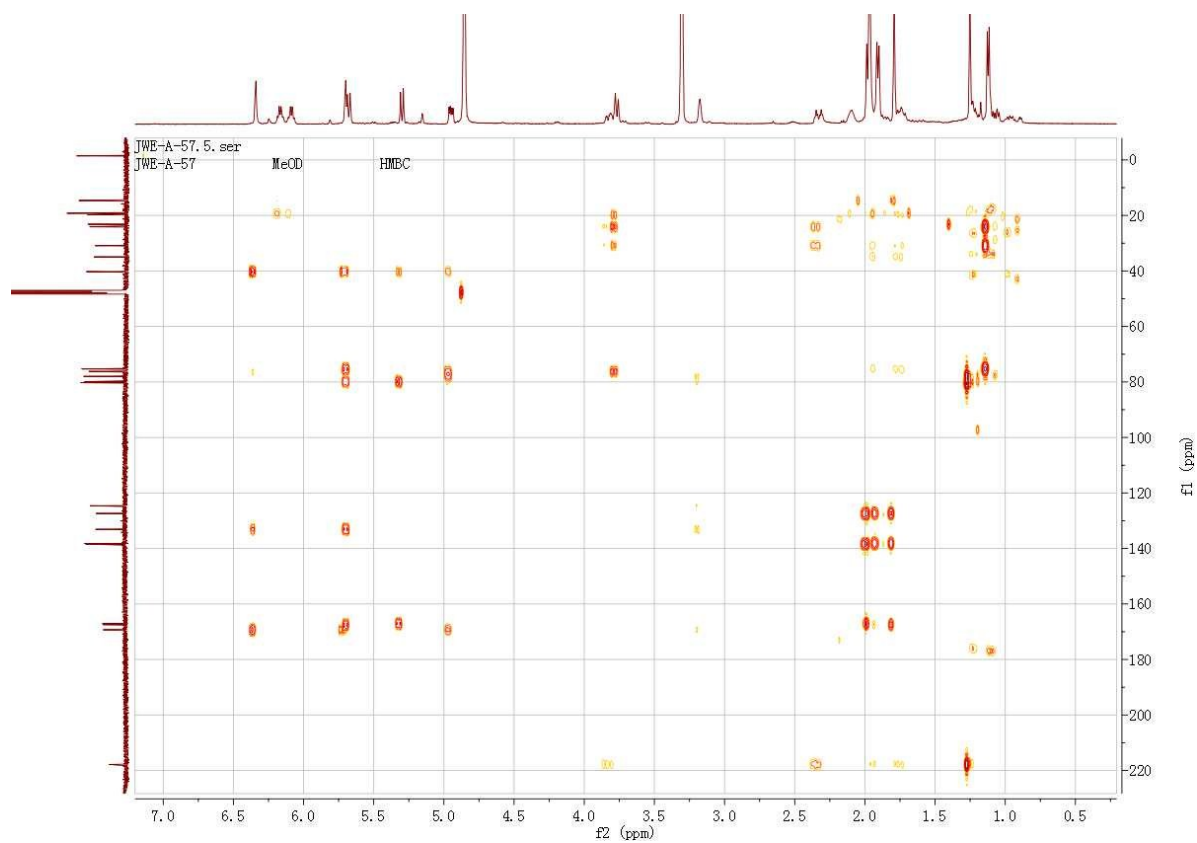

Fig. S6.5 HMBC spectrum (500 MHz) of compound **6** in CD<sub>3</sub>OD

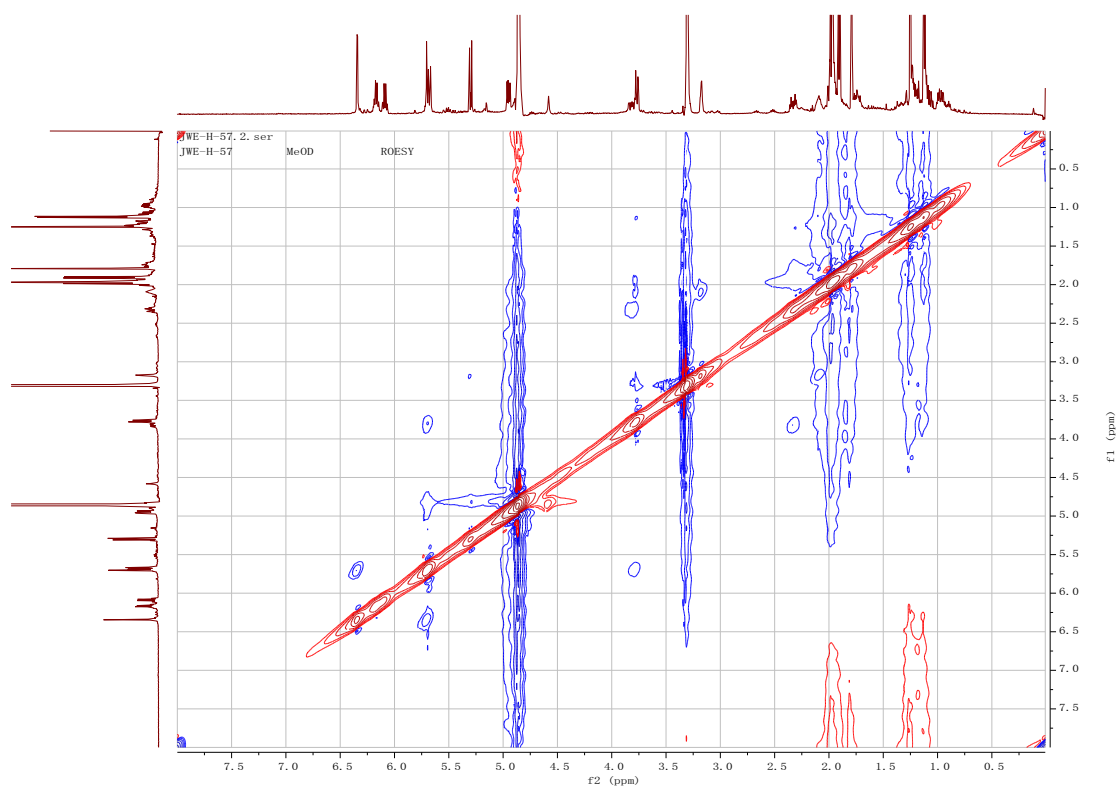

Fig. S6.6 ROESY spectrum (500 MHz) of compound **6** in CD<sub>3</sub>OD

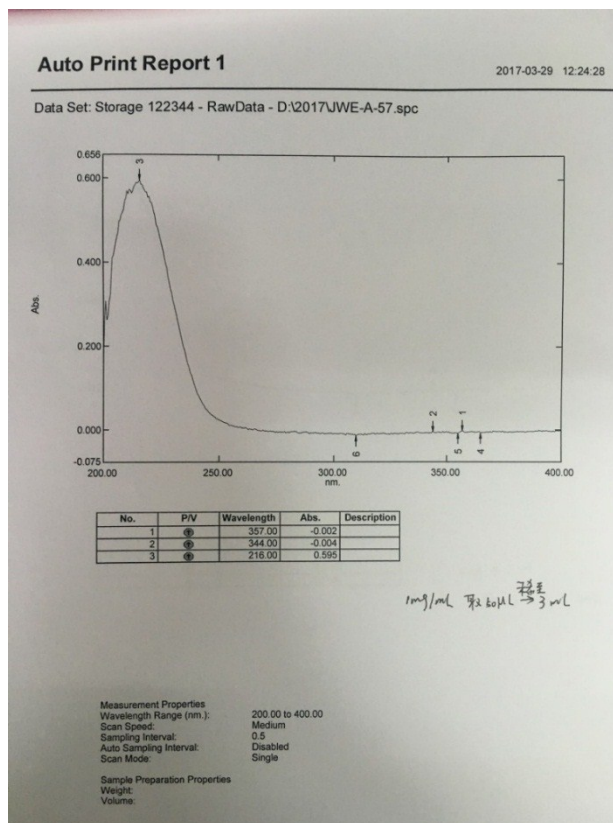

Fig. S6.7 UV spectrum of compound 6

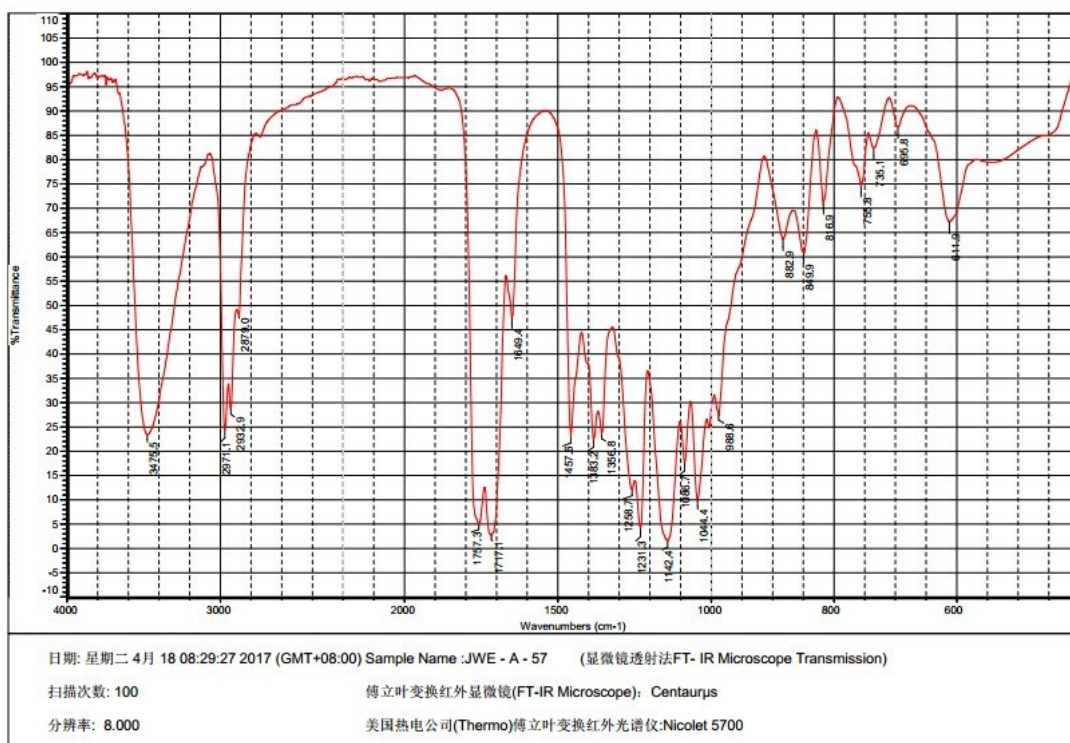

Fig. S6.8 IR spectrum of compound 6

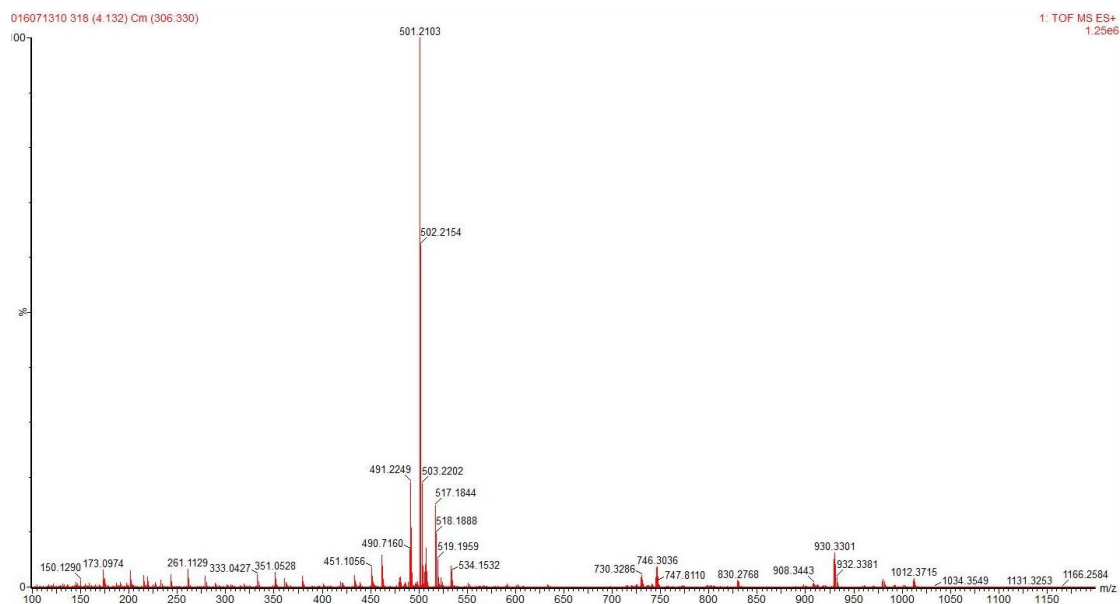

Fig. S6.9 HRESIMS spectrum of compound **6**

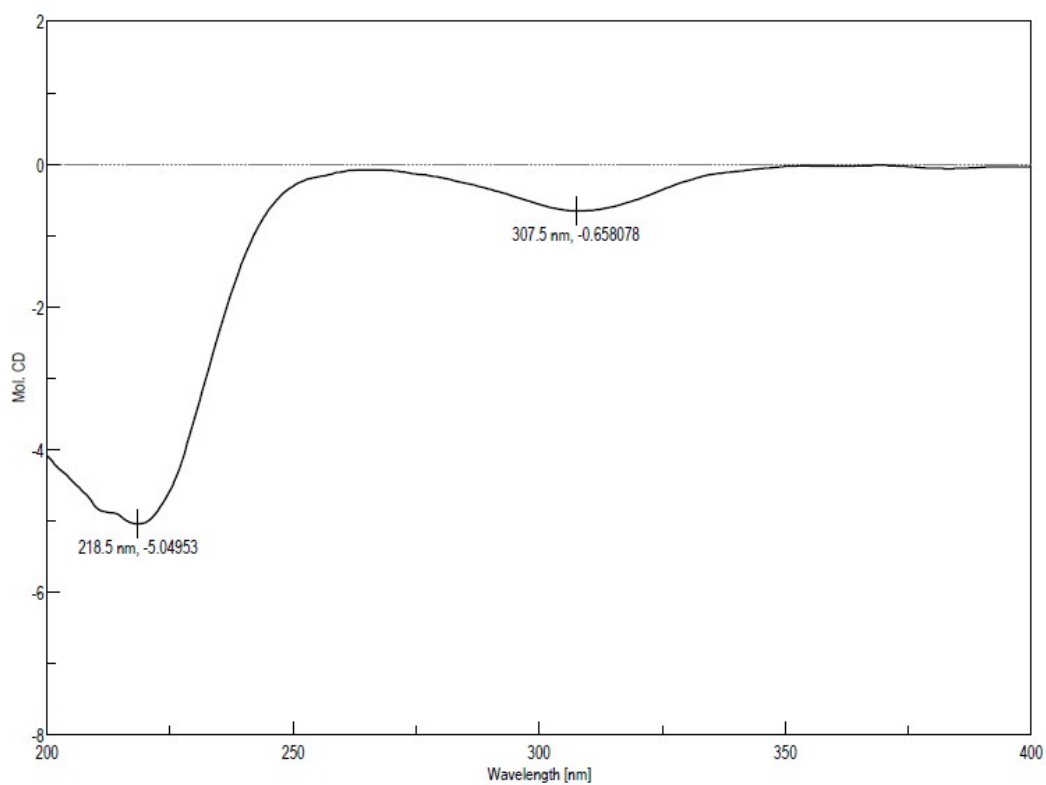

Fig. S6.10 CD spectrum of compound **6**

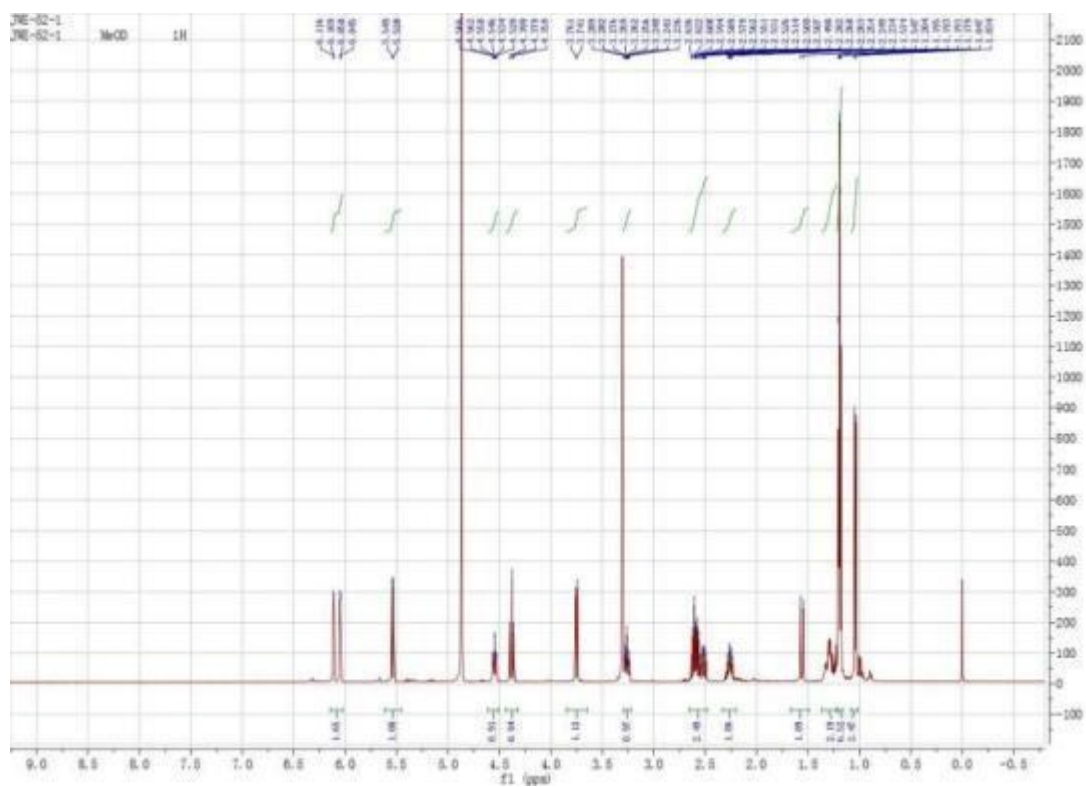

Fig. S7.1  $^1\text{H}$  NMR spectrum (500 MHz) of compound **7** in  $\text{CD}_3\text{OD}$

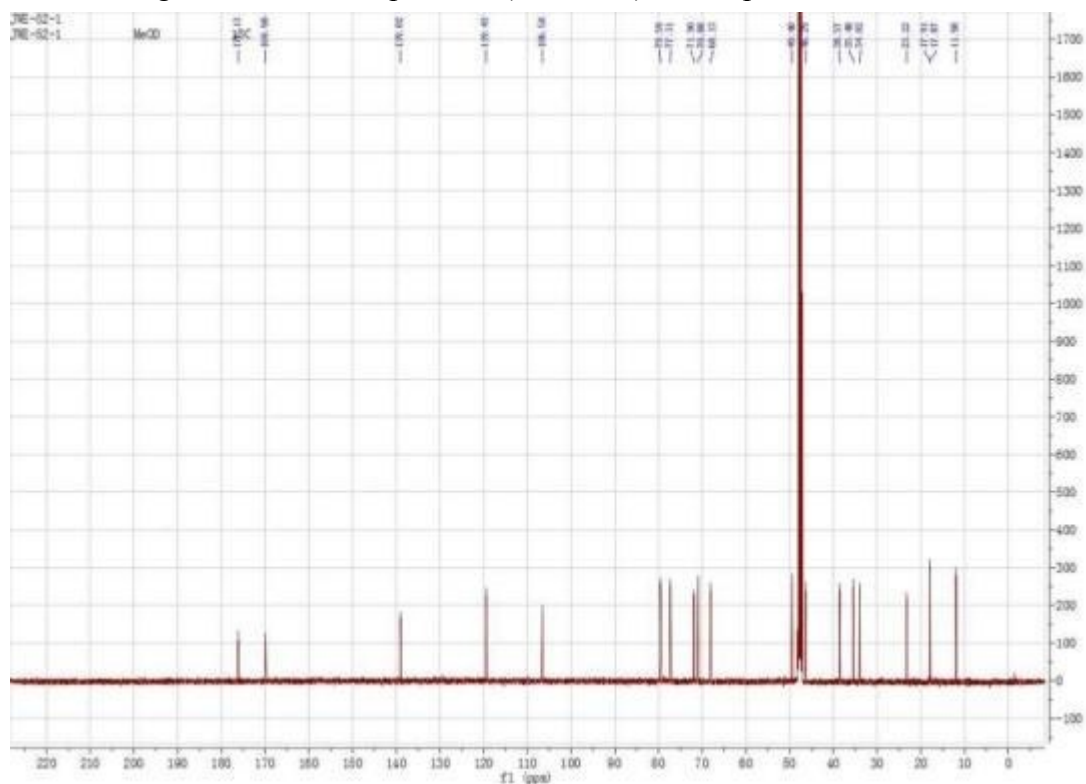

Fig. S7.2  $^{13}\text{C}$  NMR spectrum (125 MHz) of compound **7** in  $\text{CD}_3\text{OD}$

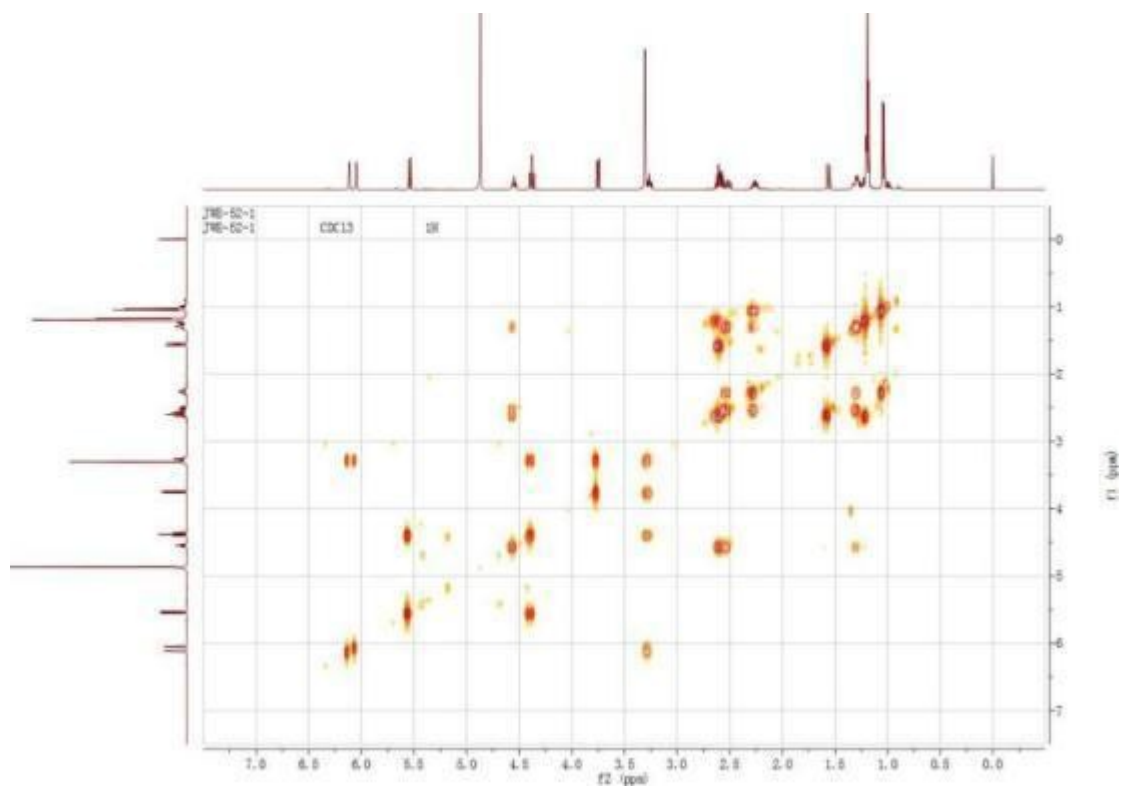

Fig. S7.3  $^1\text{H}$ - $^1\text{H}$  COSY spectrum (500 MHz) of compound **7** in  $\text{CDCl}_3$

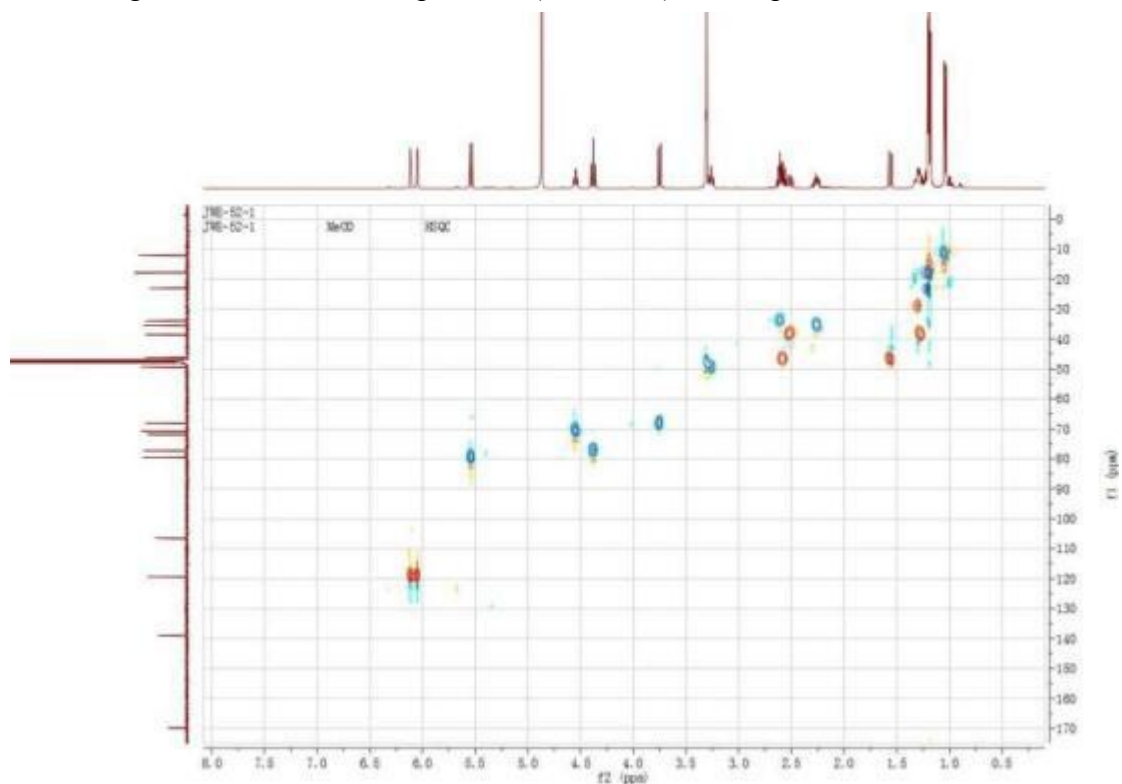

Fig. S7.4 HSQC spectrum (500 MHz) of compound **7** in  $\text{CD}_3\text{OD}$

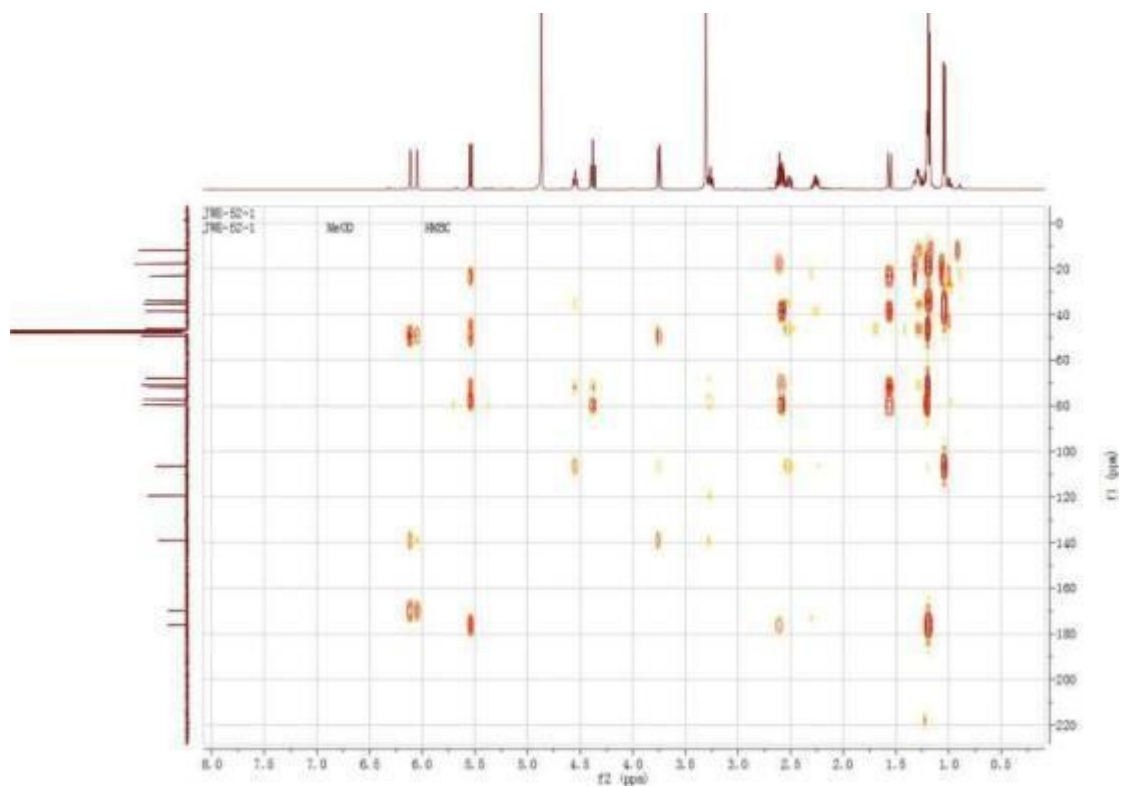

Fig. S7.5 HMBC spectrum (500 MHz) of compound **7** in CD<sub>3</sub>OD

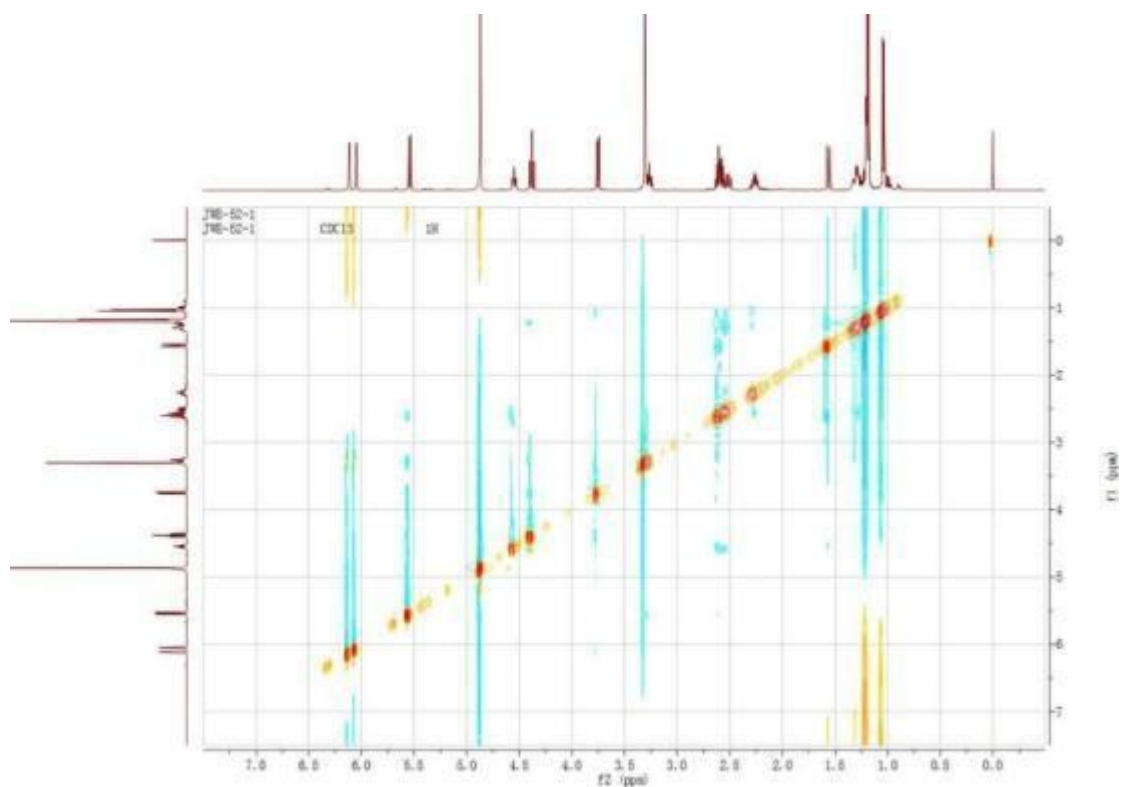

Fig. S7.6 ROESY spectrum (500 MHz) of compound **7** in CD<sub>3</sub>OD

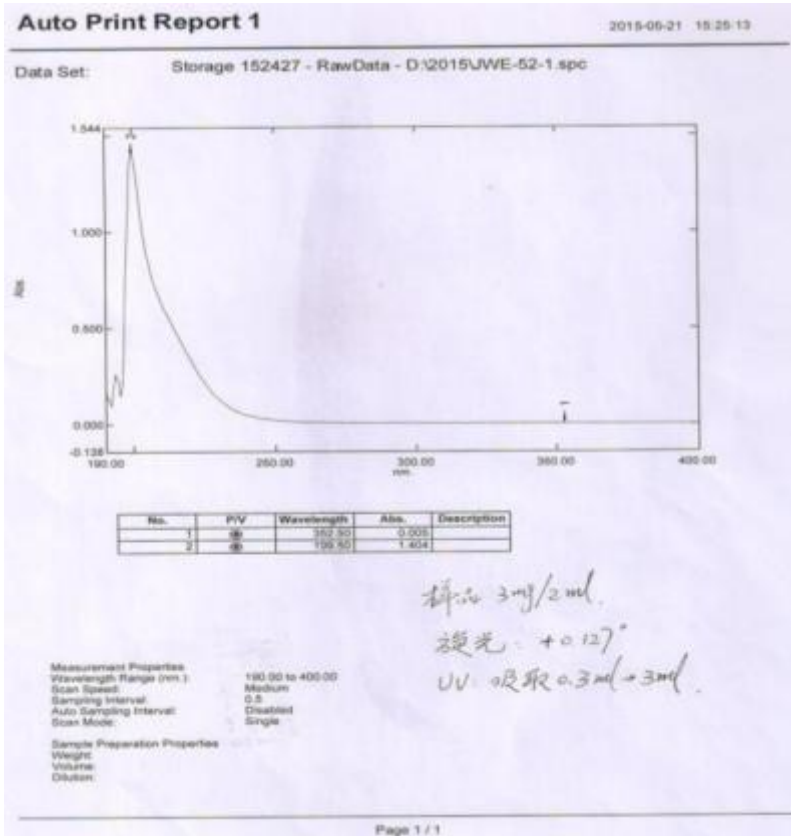

Fig. S7.7 UV spectrum of compound 7

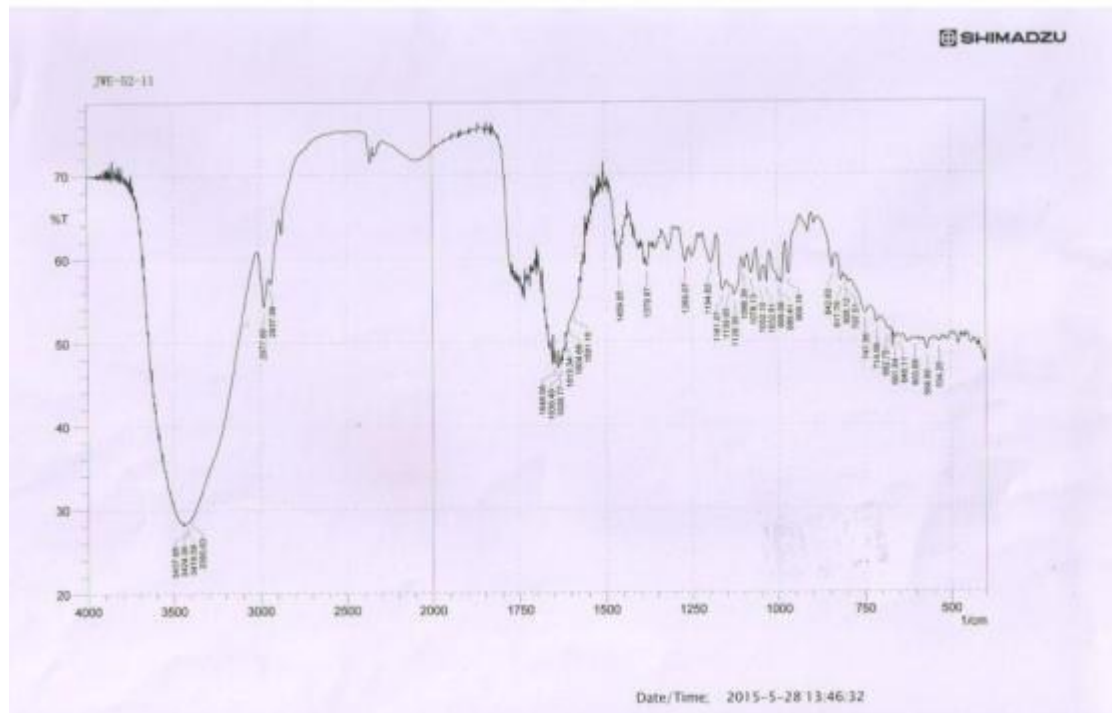

Fig. S7.8 IR spectrum of compound 7

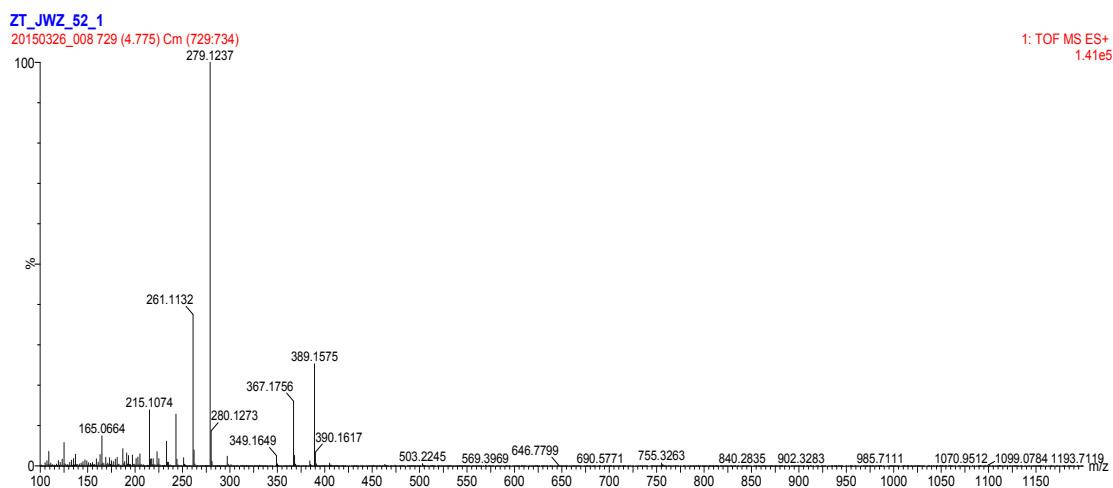

Fig. S7.9 HRMS spectrum of compound 7

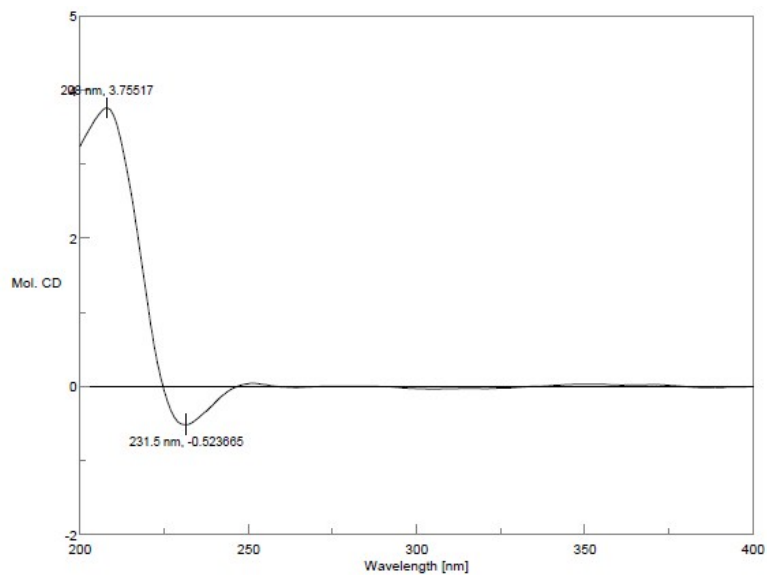

Fig. S7.10 CD spectrum of compound 7
